# Supplementary material for: Biomimetic total syntheses of spirobacillenes A and B
Source: Royal Society of Chemistry journal article supplement (doi:10.1039/c3cc42686f), 2013-01-01
Supplement: c3cc42686f.pdf [file c3cc42686f.pdf]

## Supporting Information

### Biomimetic Total Syntheses of Spirobacillenes A and B

Hongzhi Yang,<sup>§</sup> Juan Feng,<sup>§</sup> and Yefeng Tang\*

The Comprehensive AIDS Research Center, Department of Pharmacology & Pharmaceutical Sciences, School of Medicine, Tsinghua University, Beijing 100084, China

E-mail: yefengtang@tsinghua.edu.cn

<sup>§</sup>These authors contributed equally to this work.

#### Table of Contents

|                                                                    |         |
|--------------------------------------------------------------------|---------|
| General Information.....                                           | S2      |
| Part 1: Experimental Details and Characteristic Data.....          | S3-S9   |
| Part 2: NMR Spectrum.....                                          | S10-S28 |
| Part 3: X-ray Crystallographic Studies of Compound <b>14</b> ..... | S29-S45 |

## General Information:

### Experimental details

Unless otherwise mentioned, all reactions were carried out under a nitrogen atmosphere and anhydrous conditions and all reagents were purchased from commercial suppliers without further purification. Solvent purification was conducted according to Purification of Laboratory Chemicals (Perrin, D. D.; Armarego, W. L. and Perrins, D. R., Pergamon Press: Oxford, 1980). Yields refer to chromatographically and spectroscopically ( $^1\text{H}$  NMR) homogeneous materials.

Reactions were monitored by Thin Layer Chromatography on plates (GF254) supplied by Yantai Chemicals (China) using UV light as visualizing agent and an ethanolic solution of phosphomolybdic acid and cerium sulfate, and heat as developing agents. If not specially mentioned, flash column chromatography uses silica gel (200-300 mesh) supplied by Tsingtao Haiyang Chemicals (China).

NMR spectra were recorded on Bruker AV400 instrument. TMS was used as internal standard for  $^1\text{H}$  NMR (0 ppm), and solvent signal was used as reference for  $^{13}\text{C}$  NMR ( $\text{CDCl}_3$ , 77.160 ppm). The following abbreviations were used to explain the multiplicities: s = singlet, d = doublet, t = triplet, q = quartet, br = broad, td = triple doublet, qd = quarter doublet, m = multiplet.

Infrared (IR) spectra were recorded on a Thermo Nicolet Avatar 330 FT-IR spectrometer. High-resolution mass spectra (HRMS) were recorded on a Bruker ESI-Q/TOF MS, Low-resolution mass spectral analyses were performed with a Waters AQUITY UPLC/MS.

## Part 1: Experimental Details and Characteristic Data

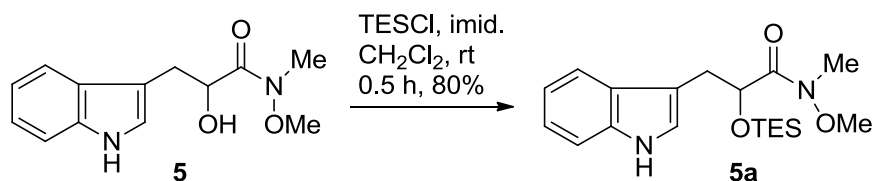

**Synthesis of compound 5a:** To a solution of Weinreb amide **5** (1.50 g, 6.04 mmol, 1.0 equiv.) in CH<sub>2</sub>Cl<sub>2</sub> (50 mL) was added imidazole (1.65 g, 24.16 mmol, 4.0 equiv.) and then a solution of TESCl (2.30 mL, 12.08 mmol, 2.0 equiv.) dropwise at room temperature. After stirring for 30 min, the solution was quenched by addition of H<sub>2</sub>O (5 mL). The organic layer was then separated, and the aqueous layer was extracted with CH<sub>2</sub>Cl<sub>2</sub> (50 mL x 3). The combined organic extracts were washed with 0.2N HCl aq. (20 mL x 2) and sat. aq. NaHCO<sub>3</sub> (100 mL x 1), dried over Na<sub>2</sub>SO<sub>4</sub>, filtered, and evaporated under reduced pressure. Purification by flash chromatography on silica gel (PE/EtOAc = 3:1) provided compound **6**<sup>[1]</sup> (1.75 g, 80%) as white solid.

**Characteristic data of 5a:** R<sub>f</sub> = 0.36 (silica gel, PE/EtOAc = 3:1); IR ν<sub>max</sub> (film): 2876, 1654, 1457, 1086, 1009, 988, 706 cm<sup>-1</sup>; <sup>1</sup>H NMR (400 MHz, CDCl<sub>3</sub>) δ 8.53 (s, 1H), 7.62 (d, *J* = 7.7 Hz, 1H), 7.36 (d, *J* = 7.9 Hz, 1H), 7.16 (t, *J* = 7.8, 7.1 Hz, 1H), 7.11 (t, *J* = 7.5, 7.3 Hz, 1H), 7.06 (s, 1H), 4.88 (t, *J* = 7.2, 5.9 Hz, 1H), 3.41 (s, 3H), 3.30 (dd, *J* = 14.0, 5.9 Hz, 1H), 3.14 (s, 3H), 3.06 (dd, *J* = 14.0, 7.2 Hz, 1H), 0.85 (t, *J* = 15.8, 7.9 Hz, 9H), 0.51 (q, *J* = 15.4, 7.6 Hz, 6H); <sup>13</sup>C NMR (100 MHz, CDCl<sub>3</sub>) δ 174.4, 136.3, 127.7, 123.8, 121.7, 119.1, 118.6, 111.4, 111.1, 69.5, 61.2, 32.6, 31.1, 6.7, 4.6 ppm; HRMS (ESI) *m/z* [M+Na]<sup>+</sup> calcd for C<sub>19</sub>H<sub>30</sub>N<sub>2</sub>O<sub>3</sub>Si 385.1918, found 385.1918.

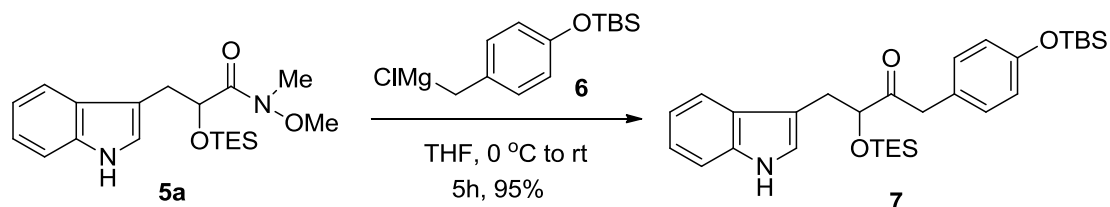

**Synthesis of compound 7:** Amide **5a** (0.38 g, 1.05 mmol, 1.0 equiv.) was dissolved in THF (4.0 mL) in a dry flask with a stir bar, and then the solution was cooled to 0 °C. A solution of (4-(tert-butyldimethylsilyloxy)benzyl) magnesium chloride **7**<sup>[2]</sup> (1.48 g, 5.25 mmol, 5.0 equiv.) was then added slowly over 5 min and the mixture was warmed to rt. It was then stirred 5 h until the starting material had been consumed. A saturated aqueous ammonium chloride solution (1.5 mL) was slowly added to the reaction mixture, and the resulting slurry was partitioned between CH<sub>2</sub>Cl<sub>2</sub> (30 mL) and half-saturated aqueous ammonium chloride solution (50 mL). The layers were separated, and the aqueous phase was extracted with CH<sub>2</sub>Cl<sub>2</sub> (2 x 25 mL). The combined organic phases were dried over sodium sulfate, filtered, and evaporated. Purification of the residue by flash chromatography on silica gel (EtOAc/petroleum ether = 12:1) afforded ketone **8**<sup>[1]</sup> as faint yellow oil (0.53 g, 95%).

**Characteristic data of 7:** R<sub>f</sub> = 0.62 (silica gel, PE/EtOAc = 2:1); IR ν<sub>max</sub> (film): 2360, 1713, 1506, 1249, 908, 835 cm<sup>-1</sup>; <sup>1</sup>H NMR (400 MHz, CDCl<sub>3</sub>) δ 8.09 (s, 1H), 7.62 (d, *J* = 7.7 Hz, 1H),

7.34 (d,  $J = 7.9$  Hz, 1H), 7.20 (t,  $J = 7.7, 7.2$  Hz, 1H), 7.13 (t,  $J = 7.4, 7.2$  Hz, 1H), 6.96 (s, 1H), 6.86 (d,  $J = 8.0$  Hz, 2H), 6.75 (d,  $J = 8.1$  Hz, 2H), 4.51 (t,  $J = 5.7$  Hz, 1H), 3.70 (d,  $J = 16.5$  Hz, 1H), 3.58 (d,  $J = 16.6$  Hz, 1H), 3.12 (d,  $J = 5.7$  Hz, 1H), 1.00 (s, 9H), 0.90 (t,  $J = 7.9$  Hz, 9H), 0.52 (q,  $J = 7.8$  Hz, 6H), 0.20 (s, 6H);  $^{13}\text{C}$  NMR (100 MHz,  $\text{CDCl}_3$ )  $\delta$  211.1, 154.5, 136.2, 130.8, 127.8, 126.7, 123.4, 122.1, 120.1, 119.5, 119.2, 111.2, 110.8, 78.6, 44.4, 31.6, 25.8, 18.3, 18.1, 6.8, 4.7, -4.3 ppm; HRMS (ESI)  $m/z$   $[\text{M}+\text{Na}]^+$  calcd for  $\text{C}_{30}\text{H}_{45}\text{NO}_3\text{Si}_2$  546.2830, found 546.2831.

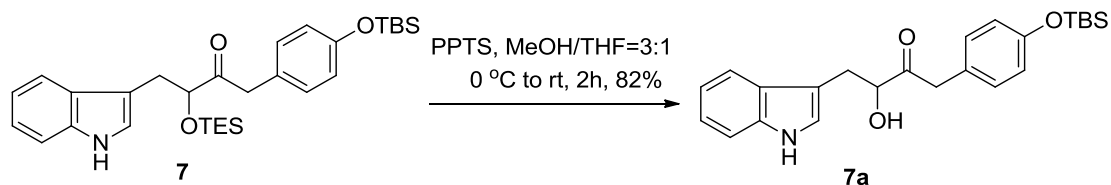

**Synthesis of compound 7a:** Ketone **7** (0.17 g, 0.32 mmol, 1.0 equiv.) was dissolved in MeOH (3 mL) and THF (1 mL). To the solution was added PPTS (2.4 mg, 0.01 mmol, 0.03 equiv.) at 0 °C. The reaction mixture was allowed to warm to r.t. and stirred for 2 h, at which time it was quenched with sat.  $\text{NaHCO}_3$ , and extracted with EtOAc. The organic phase was washed with brine, dried over  $\text{Na}_2\text{SO}_4$ , filtered, and evaporated to dryness in vacuo. The crude product was purified by flash silica gel column chromatography eluting with EtOAc/petroleum ether (1:5 then 1:3) to give compound **7a**<sup>[3]</sup> (0.11 g, 82%) as a faint yellow oil.

**Characteristic data of 7a:**  $R_f = 0.15$  (silica gel, PE/EtOAc = 3.5:1); IR  $\nu_{\text{max}}$  (film): 3412, 2916, 2361, 1710, 1510, 1472, 1457  $\text{cm}^{-1}$ ;  $^1\text{H}$  NMR (400 MHz,  $\text{CDCl}_3$ )  $\delta$  8.06 (s, 1H), 7.60 (d,  $J = 7.8$  Hz, 1H), 7.36 (d,  $J = 8.0$  Hz, 1H), 7.21 (t,  $J = 7.7, 7.2$  Hz, 1H), 7.14 (t,  $J = 7.4, 7.2$  Hz, 1H), 7.05 (s, 1H), 6.95 (d,  $J = 8.0$  Hz, 2H), 6.76 (d,  $J = 8.0$  Hz, 2H), 4.60 (dd,  $J = 6.6, 4.8$  Hz, 1H), 3.72 (d,  $J = 16.0$  Hz, 1H), 3.67 (d,  $J = 16.0$  Hz, 1H), 3.31 (dd,  $J = 10.5, 4.8$  Hz, 2H), 3.13 (dd,  $J = 15.0, 6.6$  Hz, 1H), 0.98 (s, 9 H), 0.19 (s, 6H);  $^{13}\text{C}$  NMR (100 MHz,  $\text{CDCl}_3$ )  $\delta$  210.1, 155.0, 136.3, 130.6, 127.6, 125.9, 123.1, 122.4, 120.4, 119.9, 118.9, 111.4, 110.6, 76.1, 45.0, 30.0, 25.8, 18.3, -4.3 ppm; HRMS (ESI)  $m/z$   $[\text{M}+\text{Na}]^+$  calcd for  $\text{C}_{24}\text{H}_{31}\text{NO}_3\text{Si}$  432.1965, found 432.1966.

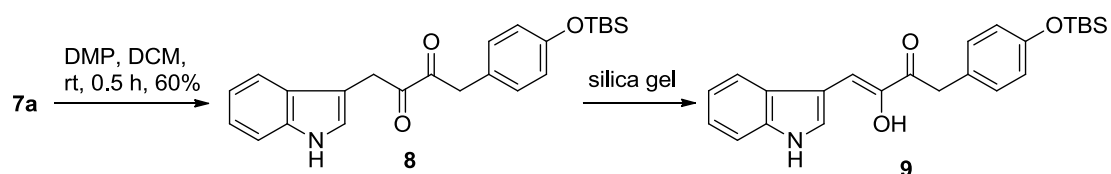

**Synthesis of compound 8 and 9:** Compound **7a** (0.17 g, 0.422 mmol, 1.0 equiv.) was dissolved in  $\text{CH}_2\text{Cl}_2$  (5.0 mL). To the stirring solution was added Dess-Martin periodinane (0.36 g, 0.845 mmol, 2.0 equiv.). The reaction was stirred for 0.5 h and then diluted with water and extraction with  $\text{CH}_2\text{Cl}_2$  (3 x 5 mL), dried over sodium sulfate, filtered and concentrated under reduced pressure. The crude was purified by flash column chromatography on silica gel using a gradient mixture of EtOAc/petroleum ether (1:4) to afford **8** as yellow oil (0.10 g, 60%), which was gradually tautomerized into **9** after long-standing in the hood.

Note: when the purification was made by preparative TLC, **9** was obtained as the major isomer.

**Characteristic data of 8:**  $^1\text{H}$  NMR (400 MHz,  $\text{CDCl}_3$ )  $\delta$  8.08 (s, 1H), 7.51 (d,  $J = 7.9$  Hz, 1H), 7.32 (d,  $J = 8.1$  Hz, 1H), 7.21 (t,  $J = 7.1, 7.1$  Hz, 1H), 7.14 (t,  $J = 7.6, 7.2$  Hz, 1H), 6.97 (s, 1H), 6.92 (d,  $J = 8.4$  Hz, 2H), 6.70 (d,  $J = 8.4$  Hz, 2H), 4.16 (s, 2H), 3.92 (s, 2H), 1.01 (s, 9H), 0.20 (s, 6H).  $^{13}\text{C}$  NMR (100 MHz,  $\text{CDCl}_3$ )  $\delta$  197.4, 196.3, 154.9, 136.2, 130.9, 127.2, 124.7, 124.1, 122.5,

120.3, 112.0, 118.8, 111.4, 105.8, 42.5, 33.3, 25.8, 18.3 ppm

**Characteristic data of 9:**  $R_f = 0.28$  (silica gel, PE/EtOAc = 4:1); IR  $\nu_{\max}$  (film): 2359, 1706, 1609, 1509, 1361, 1254, 1232, 912  $\text{cm}^{-1}$ ;  $^1\text{H}$  NMR (400 MHz,  $\text{CDCl}_3$ )  $\delta$  8.53 (s, 1H), 8.07 (s, 1H), 7.76 (d,  $J = 7.2$  Hz, 1H), 7.40 (d,  $J = 7.6$  Hz, 1H), 7.14 (m, 2H), 7.18 (d,  $J = 8.5$  Hz, 2H), 7.04 (s, 1H), 6.80 (d,  $J = 8.0$  Hz, 2H), 4.09 (s, 2H), 0.96 (s, 9H), 0.17 (s, 6H).  $^{13}\text{C}$  NMR (100 MHz,  $\text{CDCl}_3$ )  $\delta$  193.8, 154.8, 144.9, 135.8, 130.3, 128.9, 127.6, 126.9, 123.0, 120.8, 120.4, 118.3, 111.7, 110.9, 108.1, 41.2, 25.8, 18.3, 1.1, -4.3 ppm; HRMS (ESI)  $m/z$   $[\text{M}+\text{Na}]^+$  calcd for  $\text{C}_{24}\text{H}_{29}\text{NO}_3\text{Si}$  430.1809, found 430.1808.

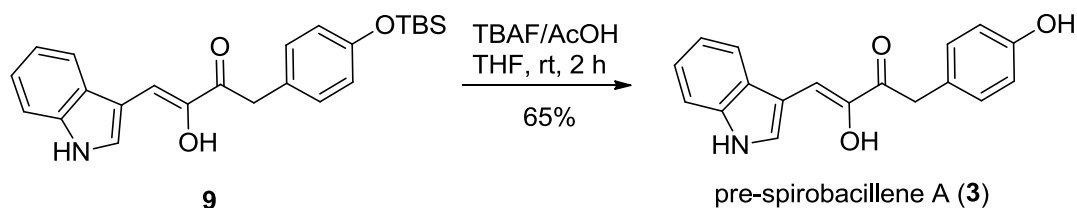

**Synthesis of pre-spirobacillene A (3):** At  $0^\circ\text{C}$  a solution of synthetic **9** (23 mg, 0.056 mmol) in THF (1 mL) was treated with an aliquot (3 drops) of a solution prepared by addition of glacial AcOH (3 drops) to TBAF (1.0 M in THF, 0.5 mL). The reaction mixture was stirred for 2 h and then partitioned between ether and water (10 mL each). The organic phase was washed with water and brine (10 mL each), dried over  $\text{Na}_2\text{SO}_4$ , filtered, and concentrated. Flash chromatography ( $\text{CH}_2\text{Cl}_2/\text{Acetone} = 20:1$ ) gave pre-spirobacillene A<sup>[4]</sup> (10.7 mg, 65%) as a yellow solid.

**Characteristic data of pre-spirobacillene A (3):**  $R_f = 0.32$  (silica gel,  $\text{CH}_2\text{Cl}_2/\text{Acetone} = 5:1$ ); IR  $\nu_{\max}$  (film): 2359, 2340, 1607, 1513, 1357, 1230, 1171, 1128  $\text{cm}^{-1}$ ;  $^1\text{H}$  NMR (400 MHz,  $\text{CD}_3\text{CN}$ )  $\delta$  9.78 (s, 1H), 8.06 (d,  $J = 2.5$  Hz, 1H), 7.92 (d,  $J = 7.5$  Hz, 1H), 7.52 (d,  $J = 7.7$  Hz, 1H), 7.27 (m, 1H), 7.24 (m, 1H), 7.20 (d,  $J = 8.4$  Hz, 2H), 6.94 (s, 1H), 6.82 (d,  $J = 8.4$  Hz, 2H), 4.16 (s, 2H);  $^{13}\text{C}$  NMR (100 MHz,  $\text{CD}_3\text{CN}$ )  $\delta$  195.0, 156.8, 145.7, 137.0, 131.5, 129.9, 127.9, 123.5, 121.3, 119.4, 118.3, 116.3, 112.8, 111.1, 108.8, 41.5 ppm; HRMS (ESI)  $m/z$   $[\text{M}+\text{H}]^+$  calcd for  $\text{C}_{18}\text{H}_{15}\text{NO}_3$  294.1125, found 294.1127.

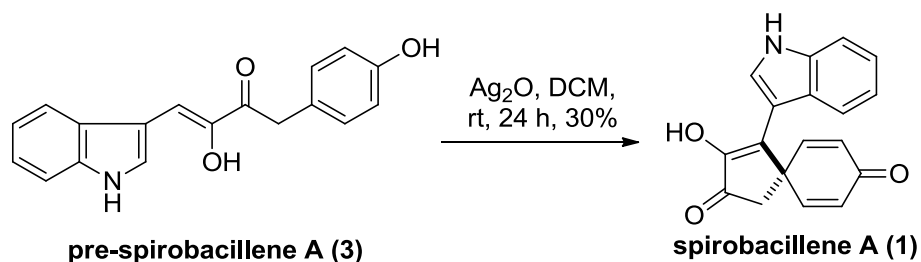

**Synthesis of spirobacillene A (1):** To a solution of pre-spirobacillene A (0.19 g, 0.648 mmol, 1.0 equiv.) in  $\text{CH}_2\text{Cl}_2$  (30 mL) was added  $\text{Ag}_2\text{O}$  (3.0, 12.96 mmol, 20.0 equiv.) in one portion. The reaction mixture was kept stirring in a flask which was covered by aluminum foil and protected with  $\text{N}_2$ . The reaction was stopped after 24 h, and the mixture was filtered through celite and concentrated under reduced pressure. The crude mixture was purified by flash column chromatography on silica gel using a gradient mixture of  $\text{CH}_2\text{Cl}_2/\text{Acetone}$  (20:1, 15:1, 10:1) to afford spirobacillene A as yellow solid (57 mg, 30%) and recovered substantial material pre-spirobacillene A (76 mg, 40%).

**Characteristic spirobacillene A (1):**  $R_f = 0.14$  (silica gel,  $\text{CH}_2\text{Cl}_2/\text{Acetone} = 20:1$ ); IR  $\nu_{\text{max}}$  (film): 2924, 2857, 2249, 1649, 1627, 1368, 1038, 918  $\text{cm}^{-1}$ ;  $^1\text{H}$  NMR (400 MHz,  $\text{CD}_3\text{CN}$ )  $\delta$  9.63 (s, 1H), 7.98 (d,  $J = 7.9$  Hz, 1H), 7.46 (m, 2H), 7.24 (ddd,  $J = 7.9, 7.2, 1.2$  Hz, 1H), 7.16 (ddd,  $J = 7.9, 7.2, 1.2$  Hz, 1H), 7.06 (d,  $J = 9.8$  Hz, 2H), 6.34 (d,  $J = 9.8$  Hz, 2H), 2.76 (s, 2H);  $^{13}\text{C}$  NMR (100 MHz,  $\text{CD}_3\text{CN}$ )  $\delta$  197.6, 185.1, 154.3, 148.2, 137.0, 136.4, 129.2, 126.1, 125.3, 122.7, 122.5, 120.2, 111.8, 109.2, 47.0, 42.2 ppm; HRMS (ESI)  $m/z$   $[\text{M}+\text{H}]^+$  calcd for  $\text{C}_{18}\text{H}_{13}\text{NO}_3$  292.0968, found 292.0966.

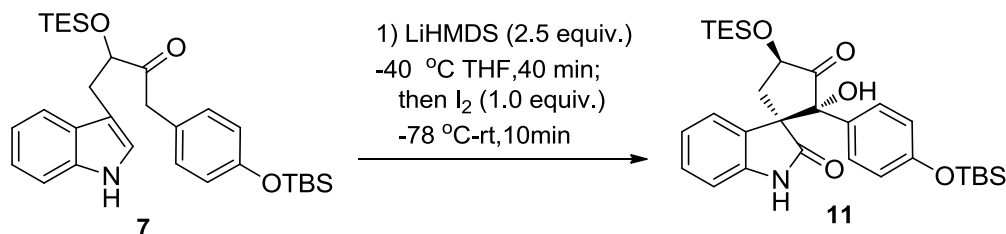

**Synthesis of compound 11:** To a solution of **7** (40.0 mg, 0.076 mmol) in dry THF (2 mL) was added LiHMDS (0.19 mL, 1 M in THF, 0.19 mmol) slowly at  $-40^\circ\text{C}$ . After being stirred at this temperature for 40 min, a solution of iodine (19.3 mg, 0.076 mmol) in THF (0.5 mL) was added dropwise at  $-78^\circ\text{C}$ . The solution was maintained at this temperature for 10 min and then warmed to room temperature, stirred for 20 min and then quenched with saturated  $\text{Na}_2\text{S}_2\text{O}_3$  solution (2 mL) and it was extracted with EtOAc. The organic phase was washed with brine, dried over  $\text{Na}_2\text{SO}_4$ , filtered, and evaporated to dryness in vacuo. The crude product was purified by preparative TLC, **11** (24 mg, 58%) was obtained.

**Characteristic data of compound 11:**  $^1\text{H}$  NMR (400 MHz,  $\text{CDCl}_3$ )  $\delta$  8.63 (s, 1H), 7.16 (d,  $J = 8.6$  Hz, 2H), 7.13 (dd,  $J = 7.8, 7.5$  Hz, 1H), 6.82 (d,  $J = 7.7$  Hz, 1H), 6.74 (d,  $J = 8.6$  Hz, 2H), 6.69 (dd,  $J = 7.8, 7.7$  Hz, 1H), 5.77 (d,  $J = 7.5$  Hz, 1H), 5.03 (dd,  $J = 9.3, 9.0$  Hz, 1H), 2.64 (dd,  $J = 13.8, 9.0$  Hz, 1H), 2.20 (dd,  $J = 13.8, 9.3$  Hz, 1H), 1.04 (t,  $J = 7.9$  Hz, 9H), 0.99 (s, 9H), 0.75 (m, 6H), 0.20 (s, 6H).  $^{13}\text{C}$  NMR (100 MHz,  $\text{CDCl}_3$ )  $\delta$  217.2, 180.8, 155.9, 141.7, 131.9, 129.1, 128.7, 127.5, 126.0, 121.9, 110.0, 83.6, 69.8, 58.8, 37.7, 29.8, 25.8, 18.4, 6.8, 5.0, 1.2, -4.3, -4.3 ppm; HRMS (ESI)  $m/z$   $[\text{M}+\text{Na}]^+$  calcd for  $\text{C}_{30}\text{H}_{43}\text{NO}_5\text{Si}_2$  576.2572, found 576.2558.

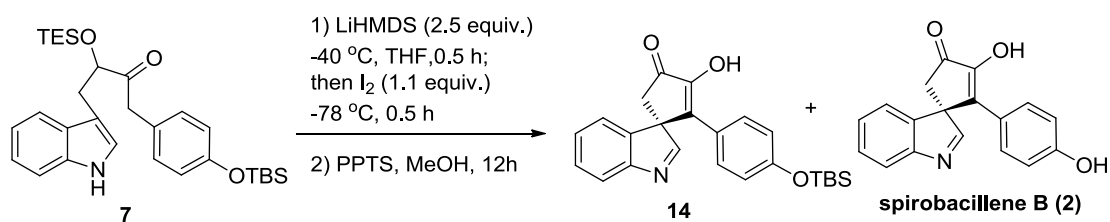

**Synthesis of compound 14 and spirobacillene B (2):** To a solution of **7** (0.12 g, 0.23 mmol) in dry THF (9 mL) was added LiHMDS (0.58 mL, 1 M in THF, 0.58 mmol) slowly at  $-40^\circ\text{C}$  with  $\text{N}_2$  protection. After being stirred at this temperature for 30 min, the reaction mixture was cooled down to  $-78^\circ\text{C}$ , and a solution of iodine (59 mg, 0.23 mmol) in THF (0.5 mL) was added dropwise. The solution was maintained at this temperature for 10 min and then warmed to room temperature over 0.5 h. Then a solution of PPTS<sup>[3]</sup> (8.80 mg, 0.034 mmol) in MeOH (27 mL) was added. The solution was maintained at room temperature for 12 h and then quenched with saturated  $\text{NaHCO}_3$  (5 mL) and it was extracted with EtOAc. The organic phase was washed with

brine, dried over Na<sub>2</sub>SO<sub>4</sub>, filtered, and evaporated to dryness in vacuo. The crude product was purified by flash silica gel column chromatography eluting with CH<sub>2</sub>Cl<sub>2</sub>/Acetone (2:1) to give compound **14** (25 mg, 27%) and spirobacillene **B** as yellow solid (7.0 mg, 10%).

**Characteristic data of compound 14:** R<sub>f</sub> = 0.32 (silica gel, CH<sub>2</sub>Cl<sub>2</sub>/Acetone = 2:1); IR v<sub>max</sub> (film): 3675, 2359, 2342, 1653, 1558, 838, 701 cm<sup>-1</sup>; <sup>1</sup>H NMR (400 MHz, CD<sub>3</sub>CN) δ 8.27 (s, 1H), 7.70 (d, *J* = 7.7 Hz, 1H), 7.45 (ddd, *J* = 7.5 Hz, 1H), 7.30 (ddd, *J* = 7.7 Hz, 1H), 7.13 (d, *J* = 8.8 Hz, 2H), 6.70 (d, *J* = 8.7 Hz, 2H), 2.94 (d, *J* = 19.0 Hz, 1H), 2.56 (d, *J* = 19.0 Hz, 1H), 0.95 (s, 9H), 0.16 (s, 6H); <sup>13</sup>C NMR (100 MHz, CD<sub>3</sub>CN) δ 198.7, 193.8, 177.1, 156.9, 150.4, 142.4, 135.5, 129.3, 128.9, 127.7, 126.2, 122.3, 121.8, 120.1, 61.6, 38.4, 25.2, 18.2, -5.0 ppm; HRMS (ESI) *m/z* [M+H]<sup>+</sup> calcd for C<sub>24</sub>H<sub>27</sub>NO<sub>3</sub>Si 406.1833, found 406.1835.

**Characteristic data of spirobacillene B (2):** R<sub>f</sub> = 0.15 (silica gel, CH<sub>2</sub>Cl<sub>2</sub>/Acetone = 2:1); IR v<sub>max</sub> (film): 2925, 1700, 1604, 1385, 1268, 840, 835, 733 cm<sup>-1</sup>; <sup>1</sup>H NMR (400 MHz, CD<sub>3</sub>CN) δ 8.27 (s, 1H), 7.71 (d, *J* = 7.8 Hz, 1H), 7.45 (ddd, *J* = 7.8, 6.6, 1.6 Hz, 1H), 7.31 (ddd, *J* = 7.5, 6.6, 1.6 Hz, 1H), 7.10 (d, *J* = 8.7 Hz, 2H), 6.66 (d, *J* = 8.8 Hz, 2H), 2.93 (d, *J* = 18.8 Hz, 1H), 2.56 (d, *J* = 18.8 Hz, 1H); <sup>13</sup>C NMR (150 MHz, CD<sub>3</sub>CN) δ 198.5, 177.1, 158.0, 155.3, 149.8, 142.4, 135.7, 129.4, 128.8, 127.4, 124.5, 122.1, 121.7, 115.4, 61.4, 38.2 ppm; HRMS (ESI) *m/z* [M+H]<sup>+</sup> calcd for C<sub>18</sub>H<sub>13</sub>NO<sub>3</sub> 292.0968, found 292.0966.

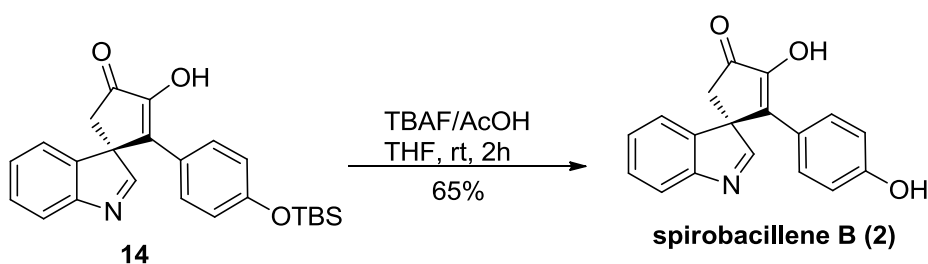

**Synthesis of spirobacillene B (2):** To a solution of synthetic compound **14** (21.1 mg, 0.055 mmol) in THF (1 mL) was treated with an aliquot (3 drops) of a solution prepared by addition of glacial AcOH (3 drops) to TBAF (1.0 M in THF, 0.5 mL). The reaction mixture was stirred for 10 min and then partitioned between ether and water (10 mL each). The organic phase was washed with water and brine (10 mL each), dried over Na<sub>2</sub>SO<sub>4</sub>, filtered, and concentrated. The crude product was purified by flash silica gel column chromatography eluting with CH<sub>2</sub>Cl<sub>2</sub>/Acetone (2:1) to give spirobacillene **B**<sup>[4]</sup> (10.4 mg, 65%).

#### Chiral separation of racemic spirobacillene B (2)

In the original isolation paper, both spirobacillene A (**1**) and B (**2**) were reported as optically active substances ( $[\alpha]_{\text{D}}^{25} = 4.4$  (c 0.10, CH<sub>3</sub>CN) for **1** and  $[\alpha]_{\text{D}}^{25} = 6.5$  (c 0.05, CH<sub>3</sub>CN) for **2**). However, spirobacillene A (**1**) does not possess a stereocenter at all. We think that the optical rotation reported for **1** should be attributed to the instrument noise or to small amounts of other chiral compounds present in the sample.

Spirobacillene B (**2**) is a chiral compound. However, the reported optical rotation for **2** was measured at a low concentration and the value is very small, making it quite suspicious. We assume that spirobacillene B (**2**) may exist as a racemic substance in the nature. In order to clarify

that if the naturally occurring spirobacillene B is a racemic or enantiopure compound, we separated the two enantiomers of spirobacillene B by chiral HPLC. It turned out that, the rotation values of (+)-**2** and (-)-**2** are  $[\alpha]_D^{25} = 16.6$  (c 1.0, CH<sub>3</sub>CN) and  $[\alpha]_D^{25} = -14.4$  (c 1.0, CH<sub>3</sub>CN), respectively. This data, if not confirm, at least supports our assumption that the naturally occurring **2** is a racemic or partially racemic substance.

#### Chiral separation of racemic spirobacillene B (**2**)

HPLC profiles of separation of **2** on chiral column (phenomenex p/No 00G-4456-E0, Desc: Lux 3  $\mu$  Cellulose-2, Size:250\*4.60 mm; Detector: 356 nm; Solvent: MeOH: H<sub>2</sub>O = 70:30; Temperature: 25 °C)

#### (±)-spirobacillene B

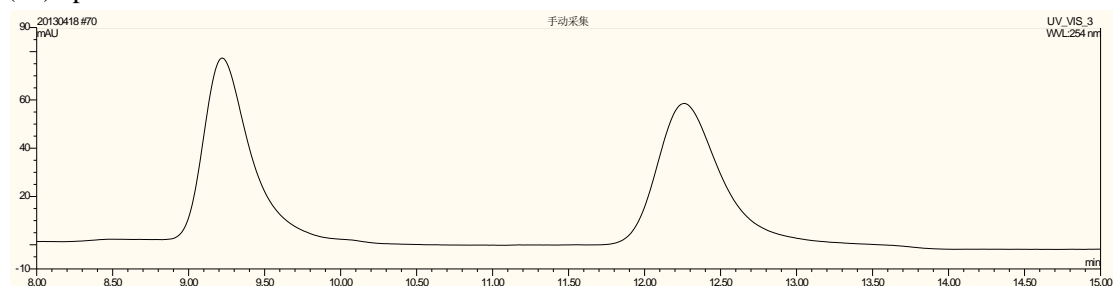

#### (+)-spirobacillene B

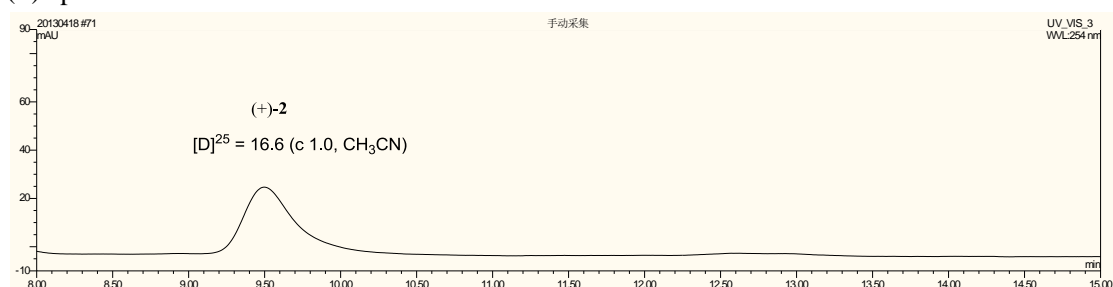

#### (-)-spirobacillene B

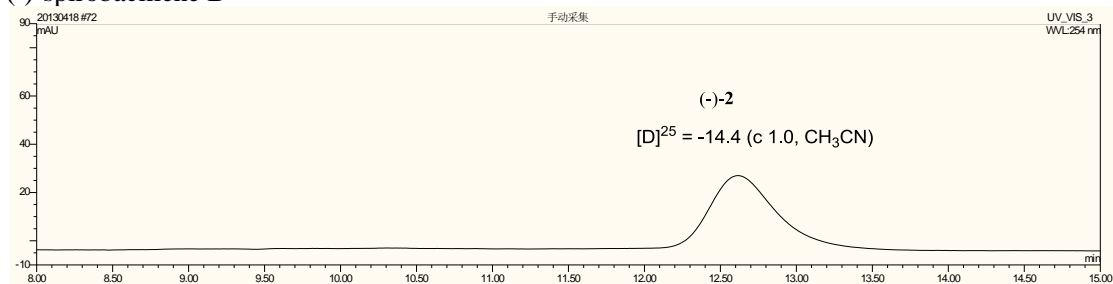



## References

- [1] Christiansen, M. A.; Butler, A. W.; Hill, A. R.; Andrus, M. B. *Synlett*. **2009**, 653-657.
- [2] (a) Adamczyk, M.; Johnson, D. D.; Mattingly, P. G.; Pan, Y.; Reddy, R. E. *Org. Prep. Proced. Int.* **2001**, 33, 477-485. (b) Balskus, E. P.; Walsh, C. T. *J. Am. Chem. Soc.* **2008**, 130, 15260-15261.
- [3] Shimada, K.; Kaburagi, Y.; Fukuyama, T. *J. Am. Soc. Chem.* **2003**, 125, 4048-4049.
- [4] Smith, A. B., III; Condon, S. M.; Mccauley, J. A.; Leazer, J. L., Jr.; Leahy, J. W.; Maleczka, R. E. *J. Am. Chem. Soc.* **1997**, 119, 962-973.

## Part 2: NMR Spectra

<sup>1</sup>H-NMR Spectrum for **5a** (CDCl<sub>3</sub>, 400 MHz)

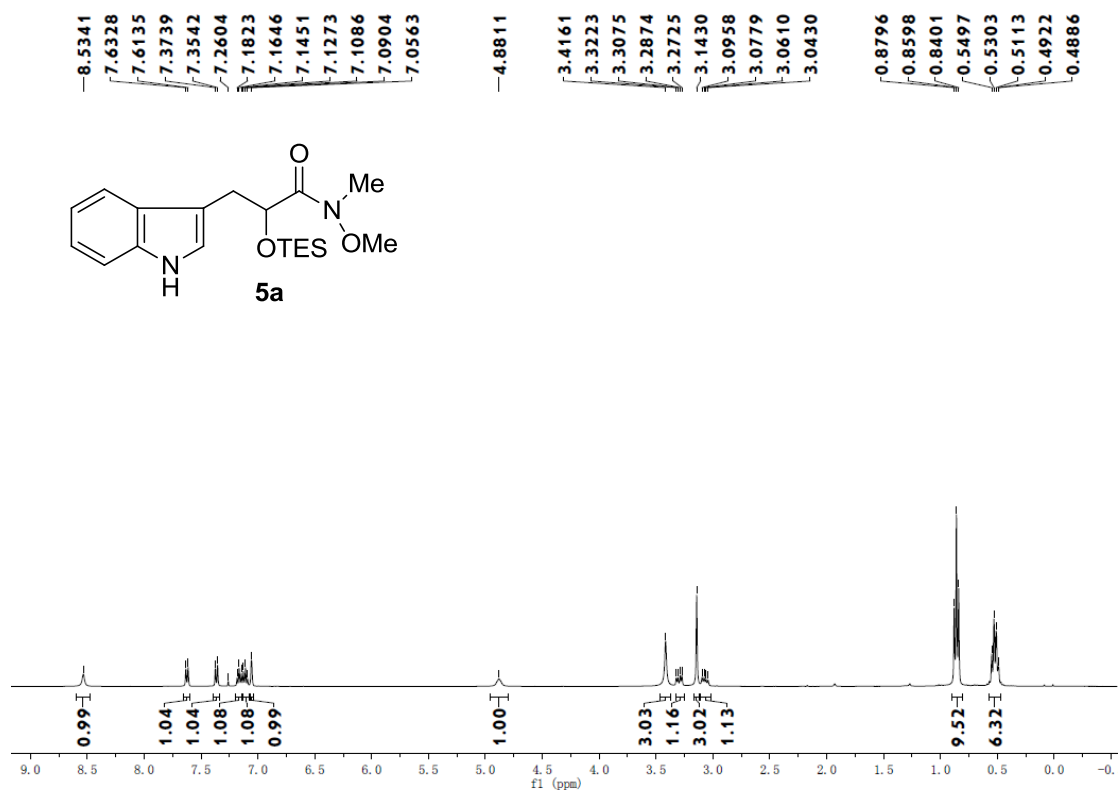

<sup>13</sup>C-NMR Spectrum for **5a** (CDCl<sub>3</sub>, 101 MHz)

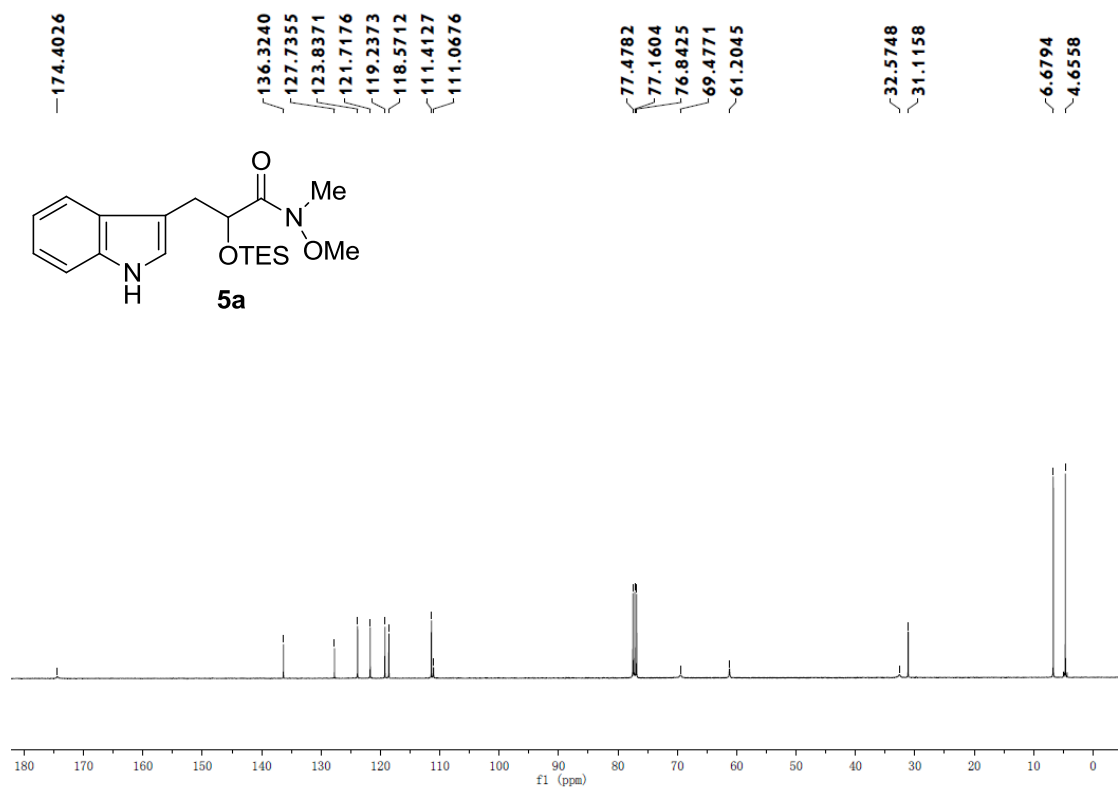

<sup>1</sup>H-NMR Spectrum for **7** (CDCl<sub>3</sub>, 400 MHz)

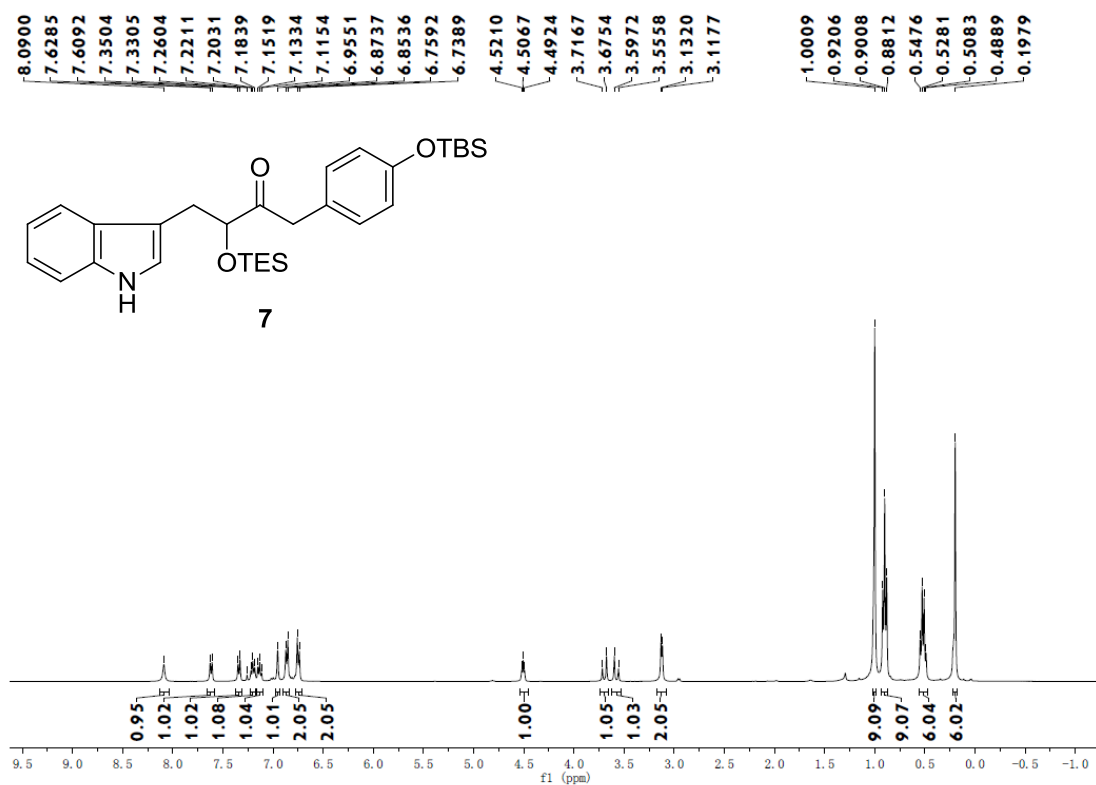

<sup>13</sup>C-NMR Spectrum for **7** (CDCl<sub>3</sub>, 101 MHz)

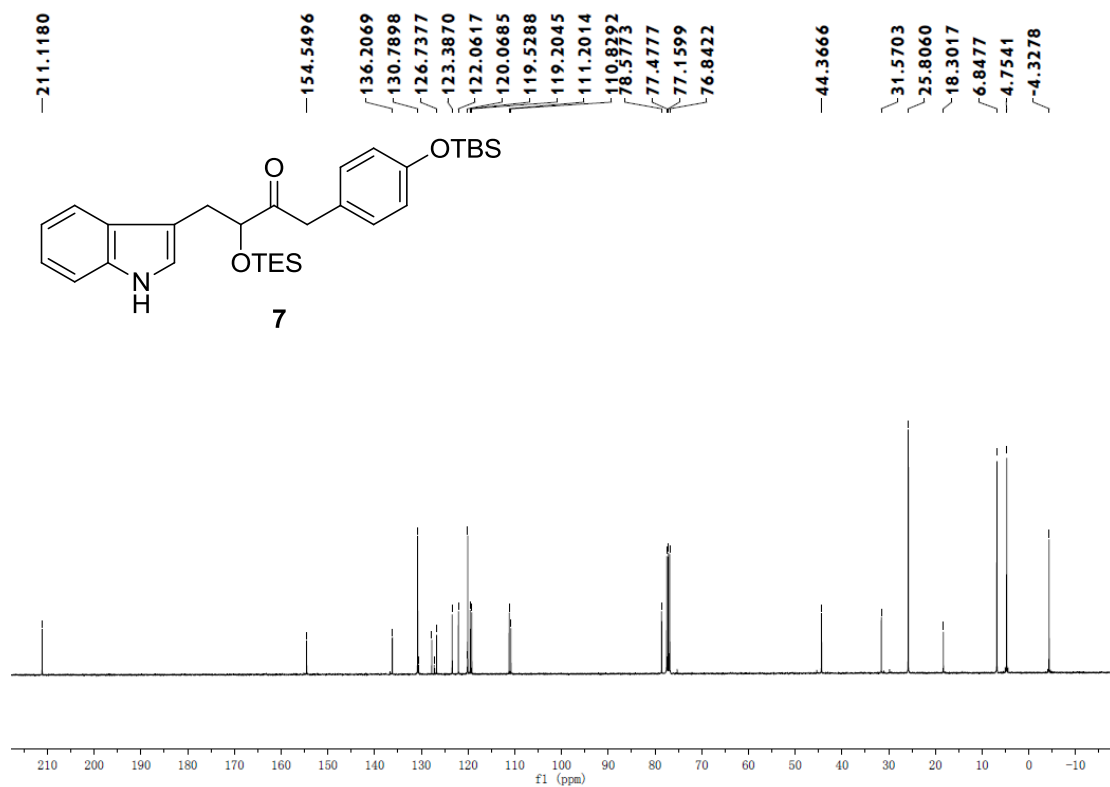

<sup>1</sup>H-NMR Spectrum for **7a** (CDCl<sub>3</sub>, 400 MHz)

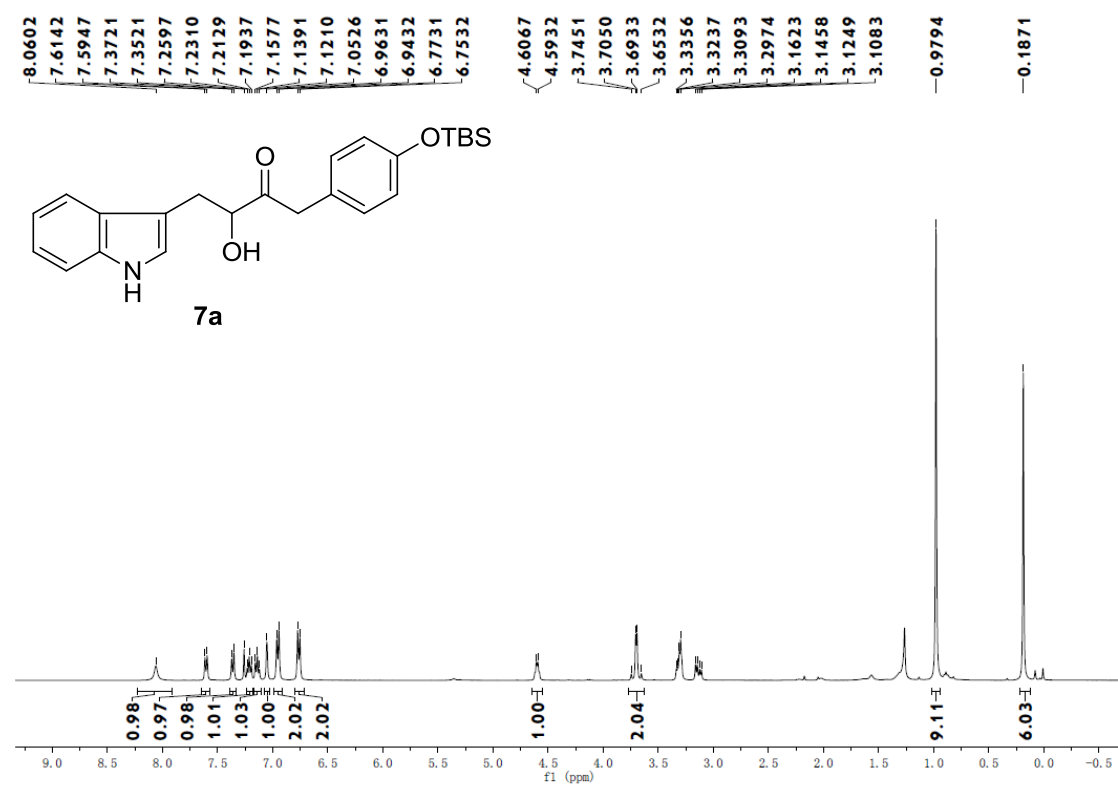

<sup>13</sup>C-NMR Spectrum for **7a** (CDCl<sub>3</sub>, 101 MHz)

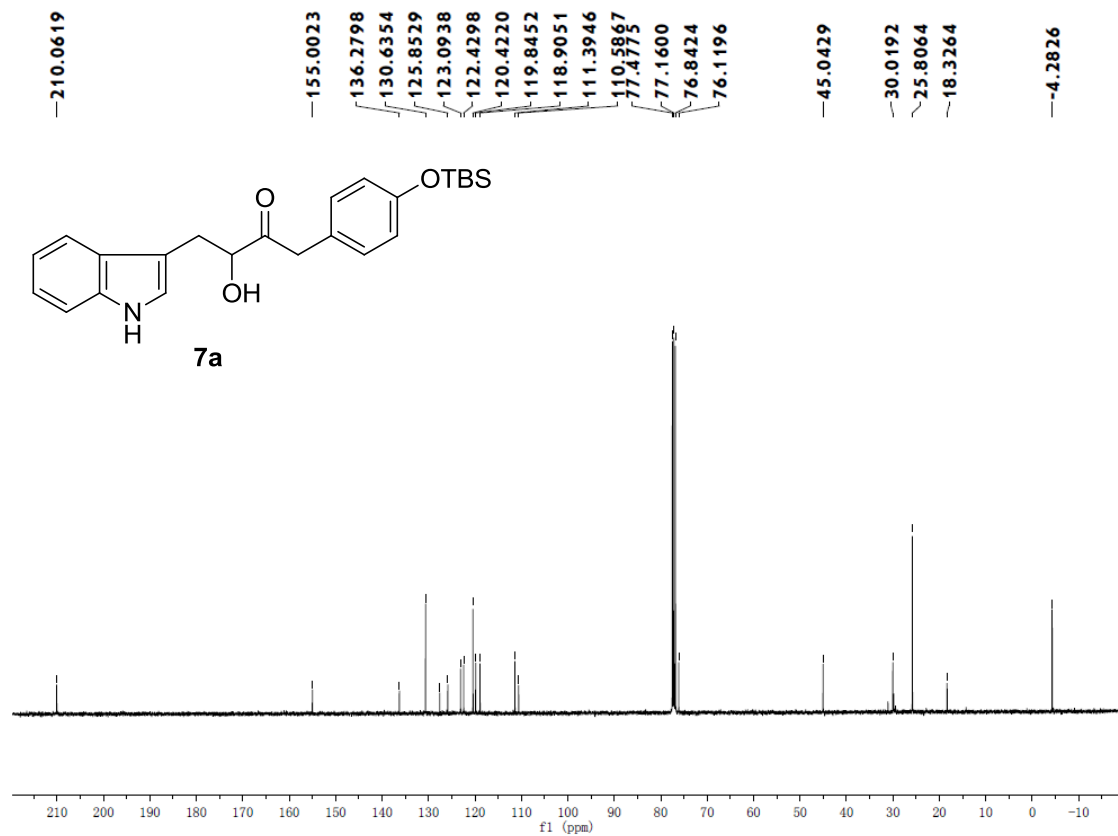

$^1\text{H-NMR}$  Spectrum for **8** ( $\text{CDCl}_3$ , 400 MHz)

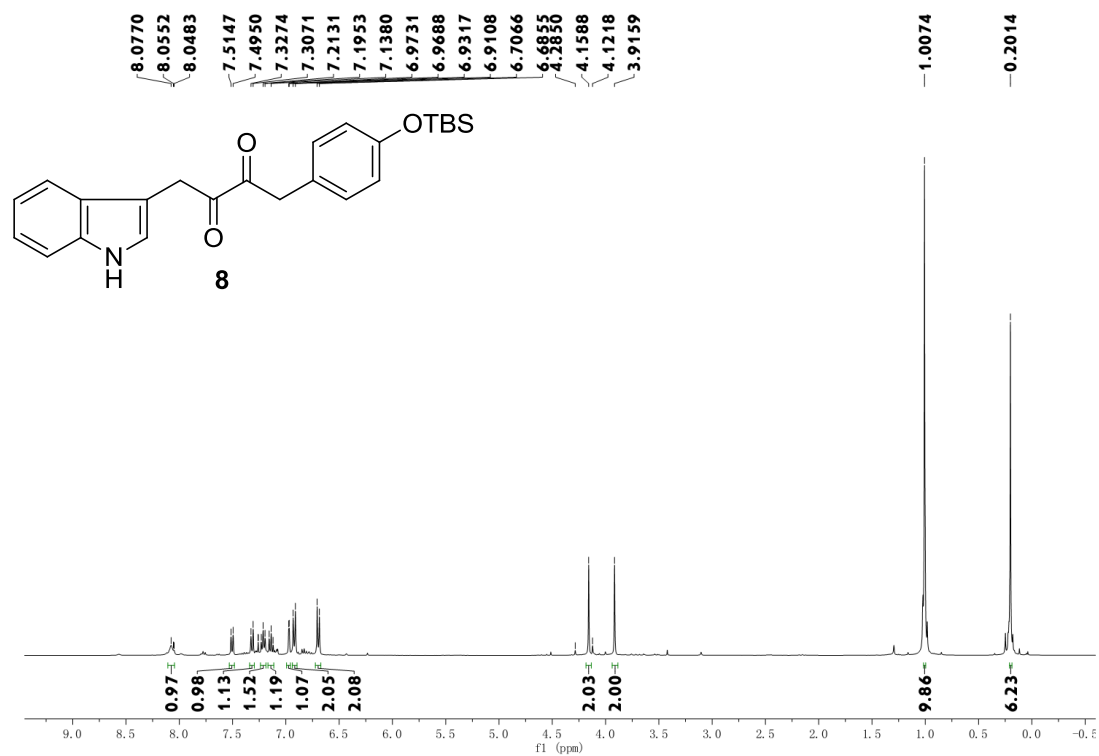

$^{13}\text{C-NMR}$  Spectrum for **8** ( $\text{CDCl}_3$ , 101 MHz)

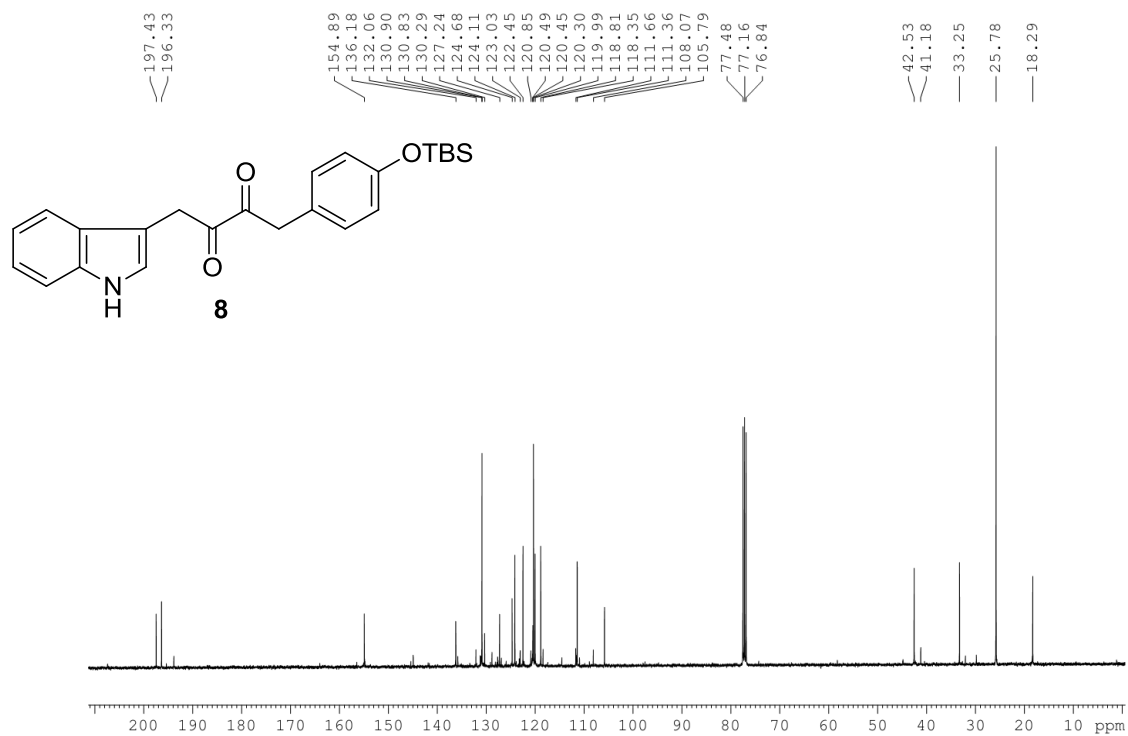

<sup>1</sup>H-NMR Spectrum for **9** (CDCl<sub>3</sub>, 400 MHz)

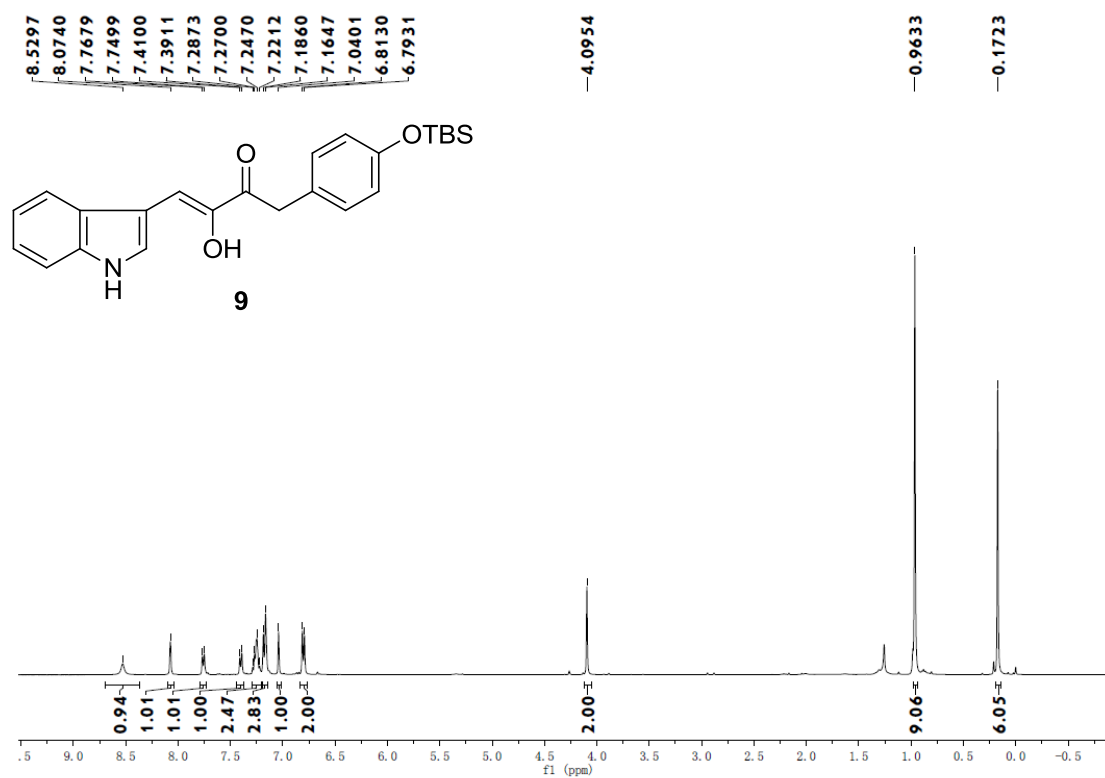

<sup>13</sup>C-NMR Spectrum for **9** (CDCl<sub>3</sub>, 101 MHz)

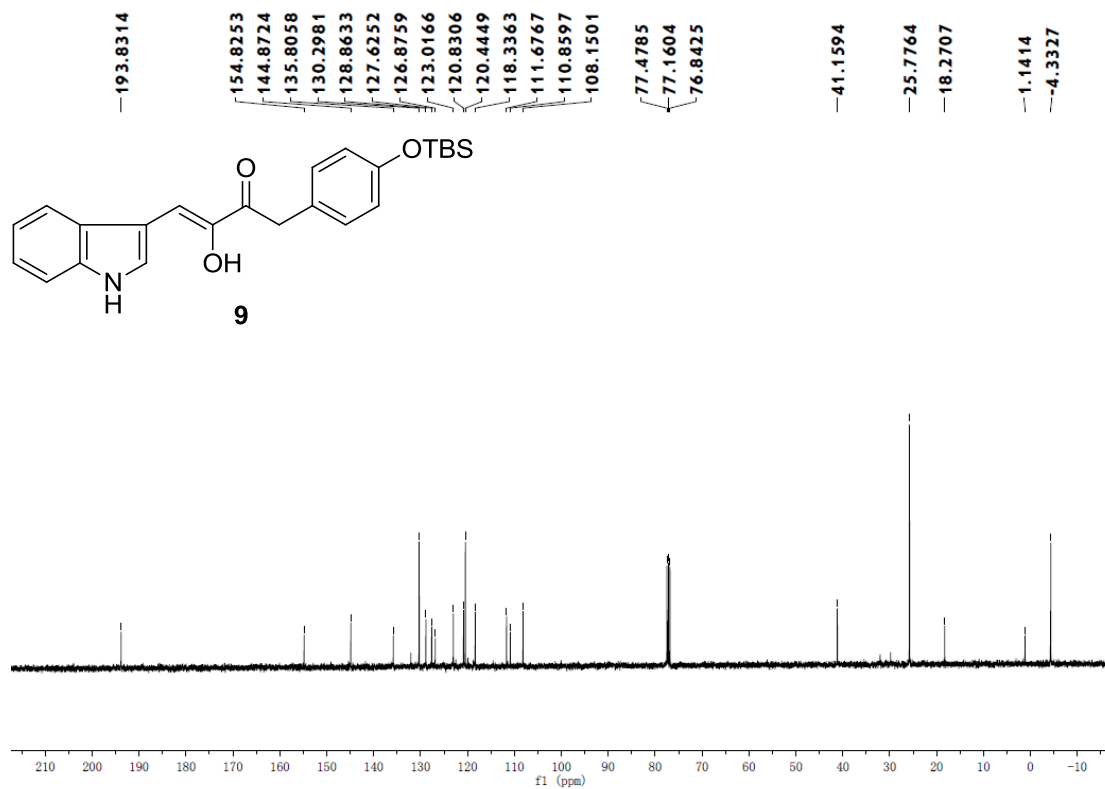

$^1\text{H-NMR}$  Spectrum for pre-spirobacillene A and B (16:1) ( $\text{CDCl}_3$ , 400 MHz)

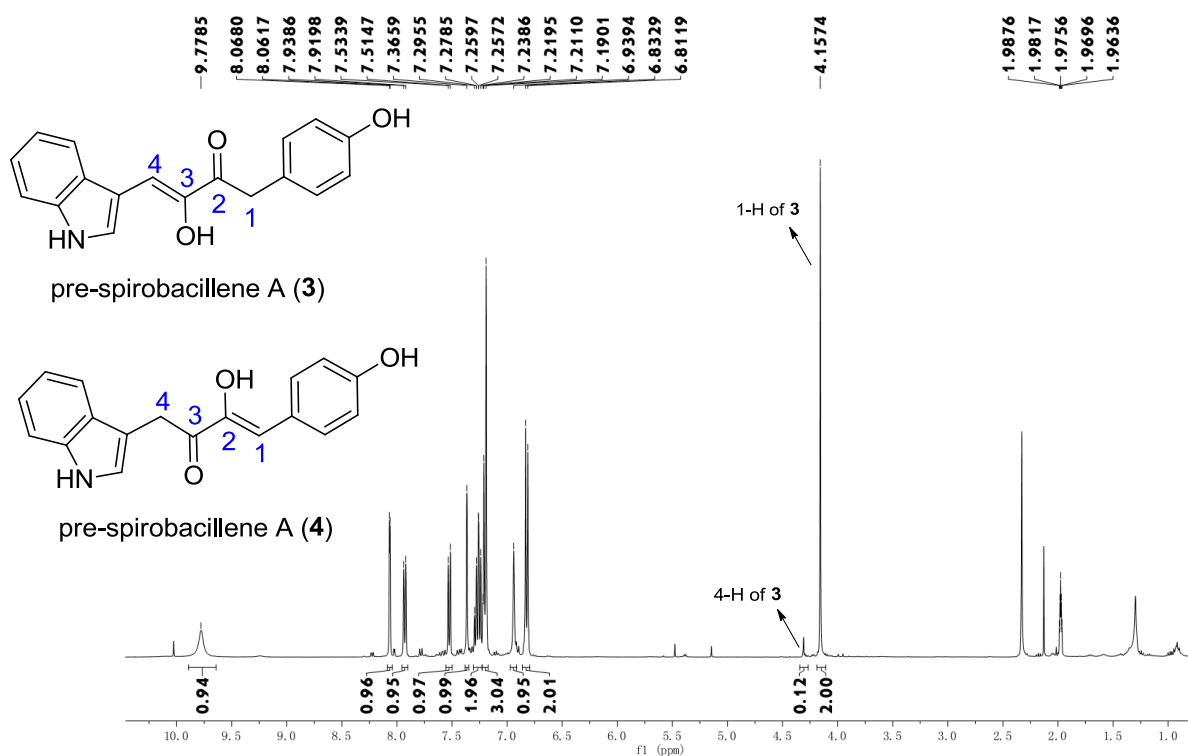

$^{13}\text{C-NMR}$  Spectrum for pre-spirobacillene A (3) ( $\text{CDCl}_3$ , 101 MHz)

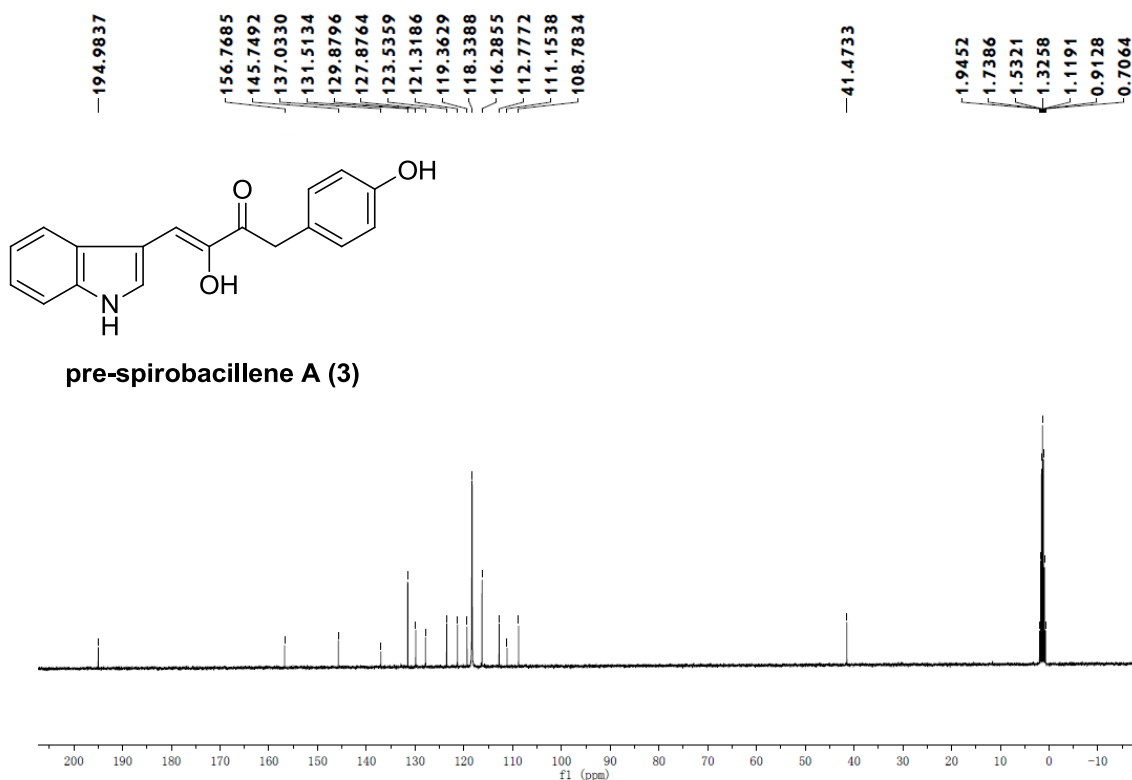

$^1\text{H-NMR}$  Spectrum for compound **11** ( $\text{CDCl}_3$ , 400 MHz)

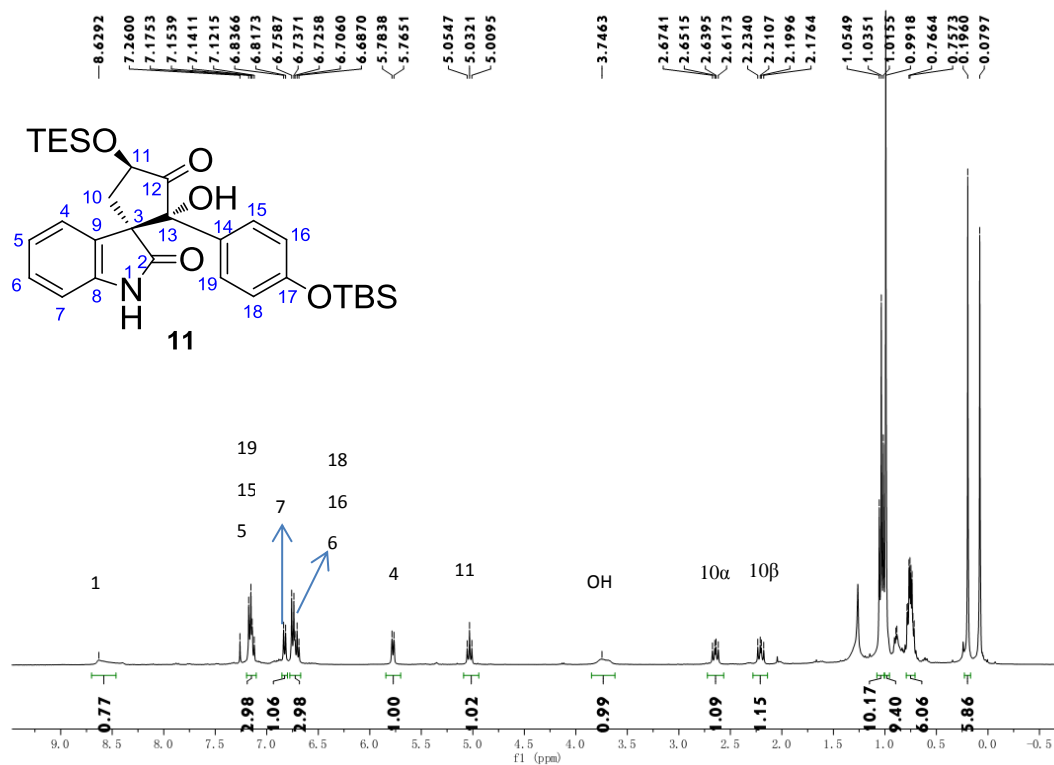

$^{13}\text{C-NMR}$  Spectrum for compound **11** ( $\text{CDCl}_3$ , 101 MHz)

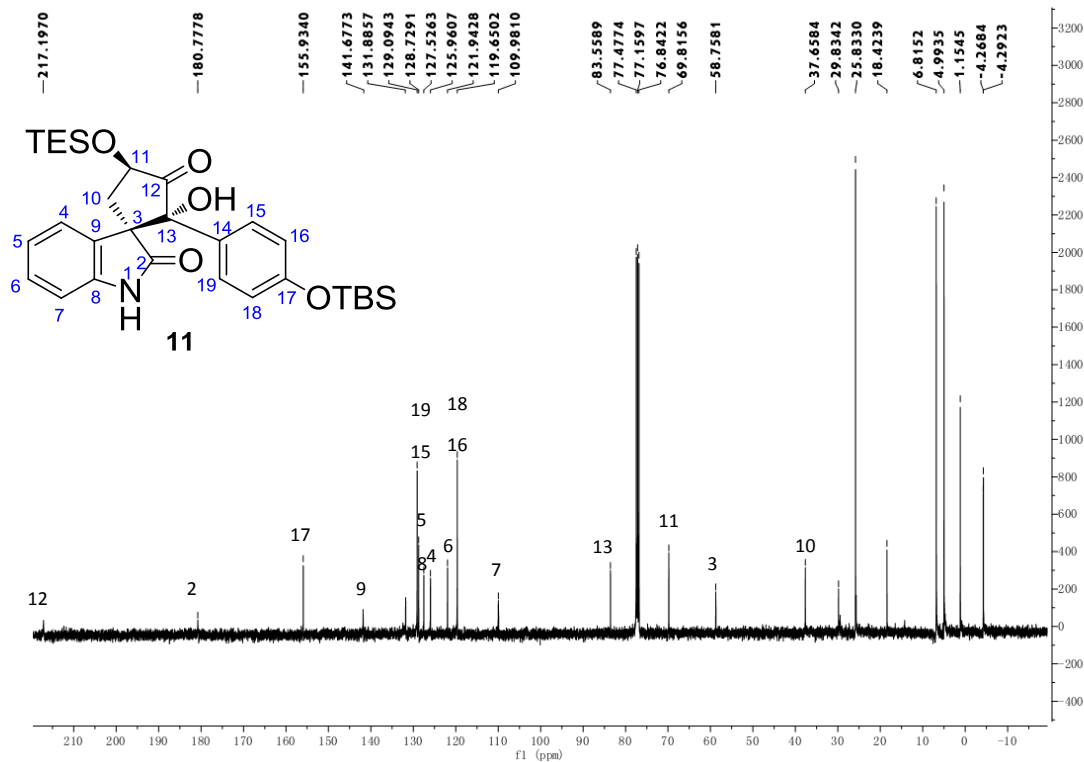



DEPT Spectrum for compound **11** (CDCl<sub>3</sub>, 101 MHz)

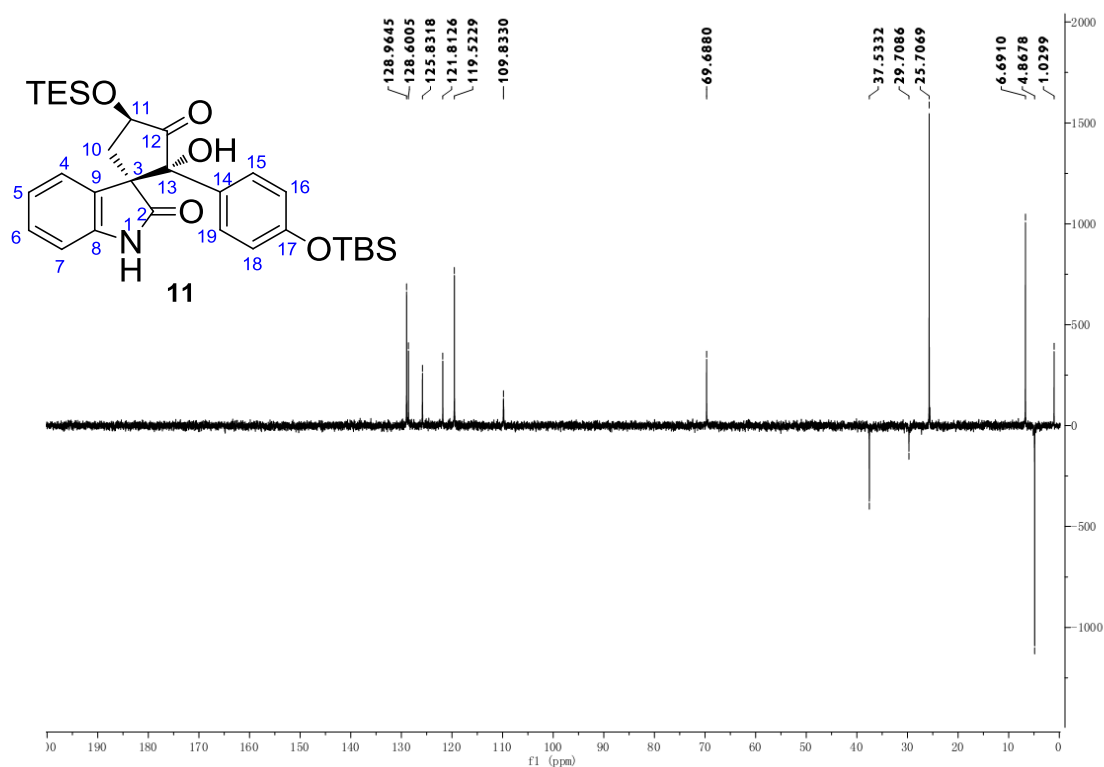

HSQC Spectrum for compound **11** (CDCl<sub>3</sub>, 400 MHz)

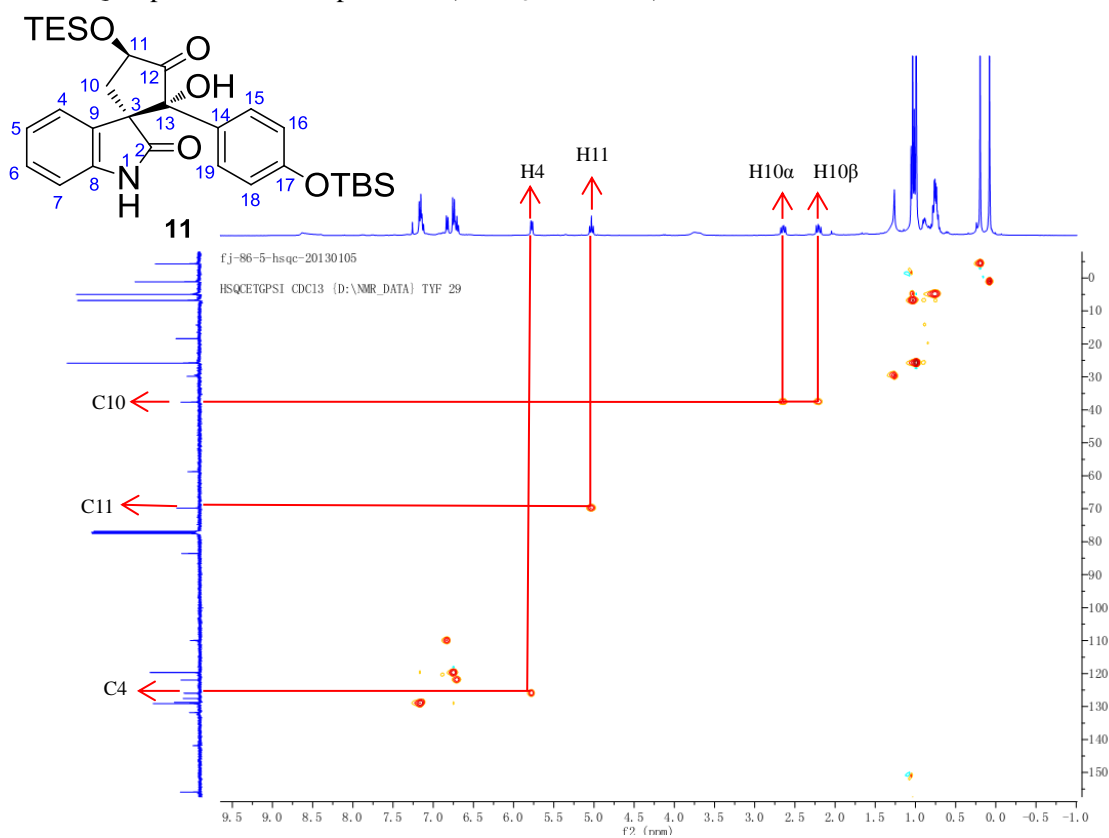

HMBC Spectrum for compound **11** (CDCl<sub>3</sub>, 400 MHz)

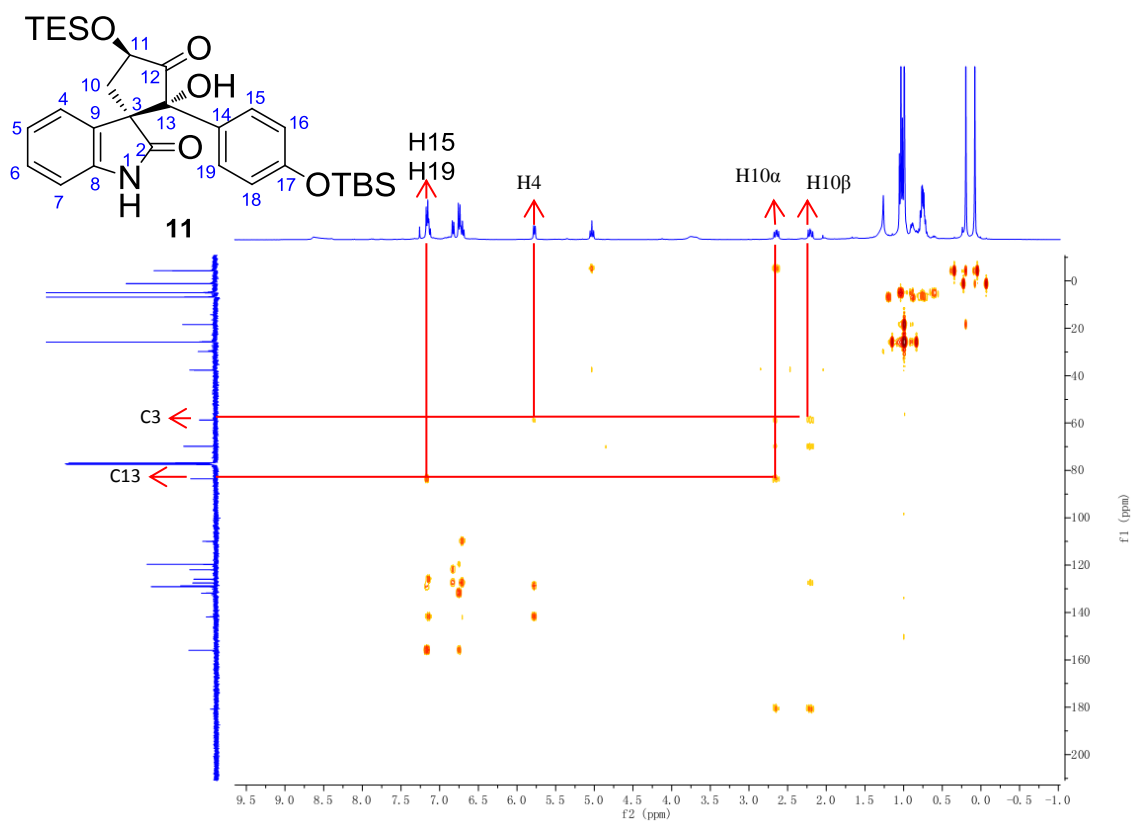

NOESY Spectrum for compound **11** (CDCl<sub>3</sub>, 400 MHz)

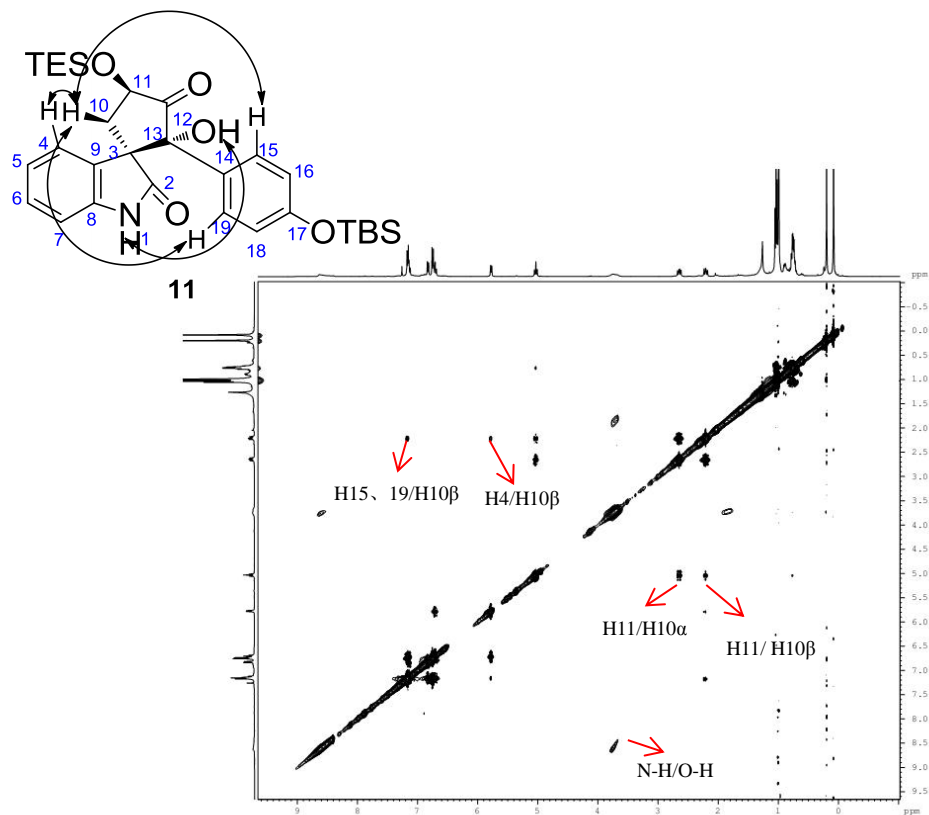

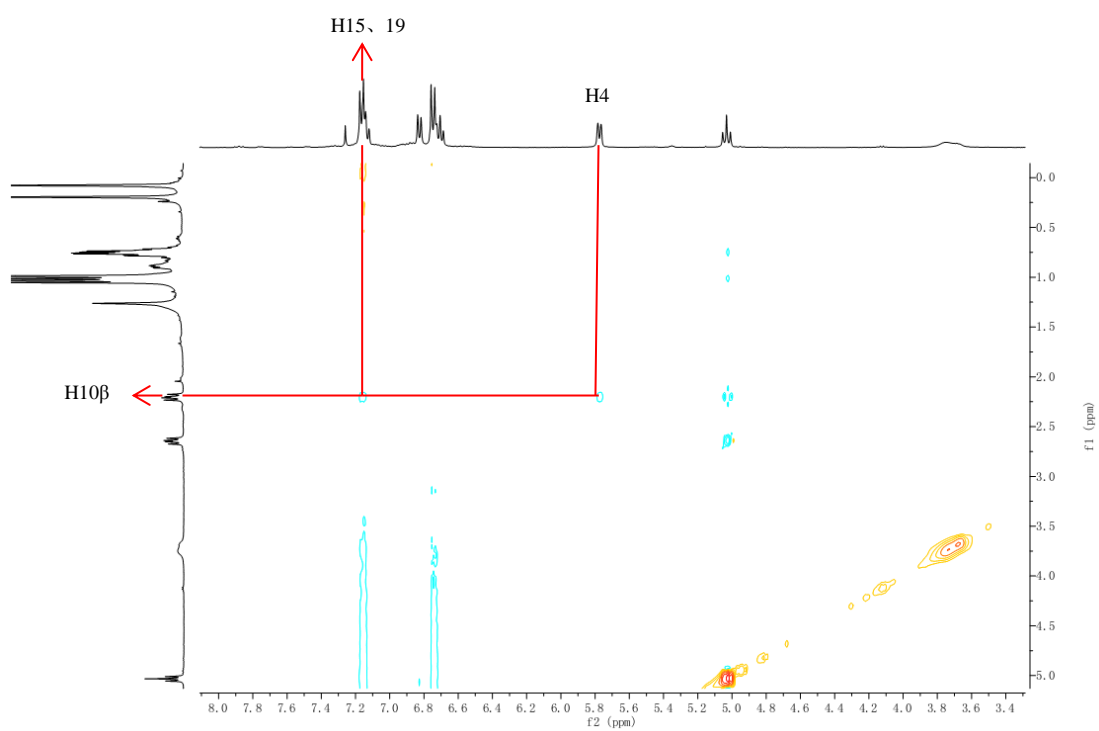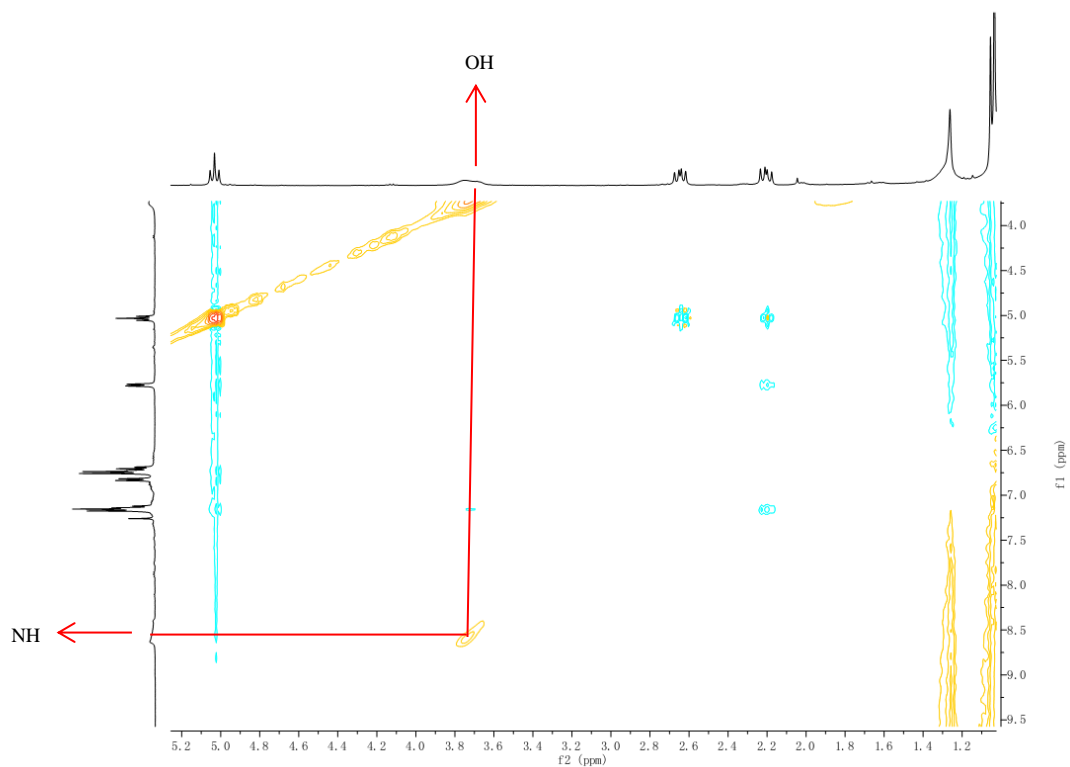

$^1\text{H-NMR}$  Spectrum for compound **14** ( $\text{CD}_3\text{CN}$ , 400 MHz)

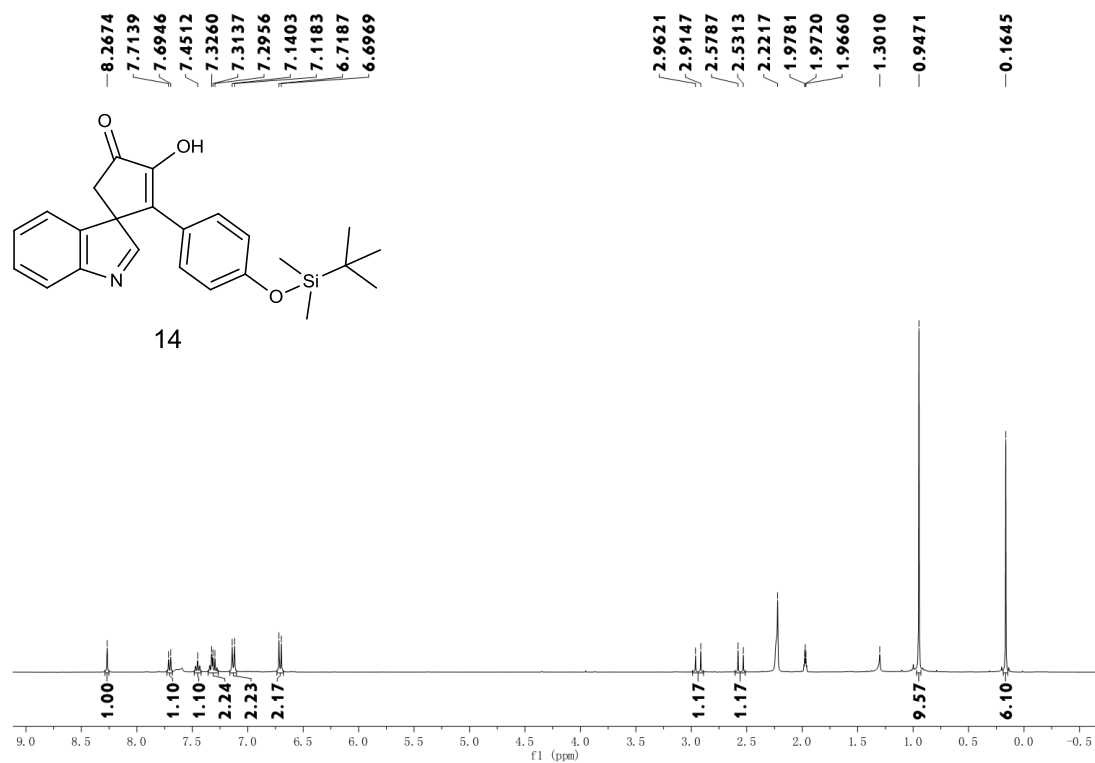

$^{13}\text{C-NMR}$  Spectrum for compound **14** ( $\text{CD}_3\text{CN}$ , 101 MHz)

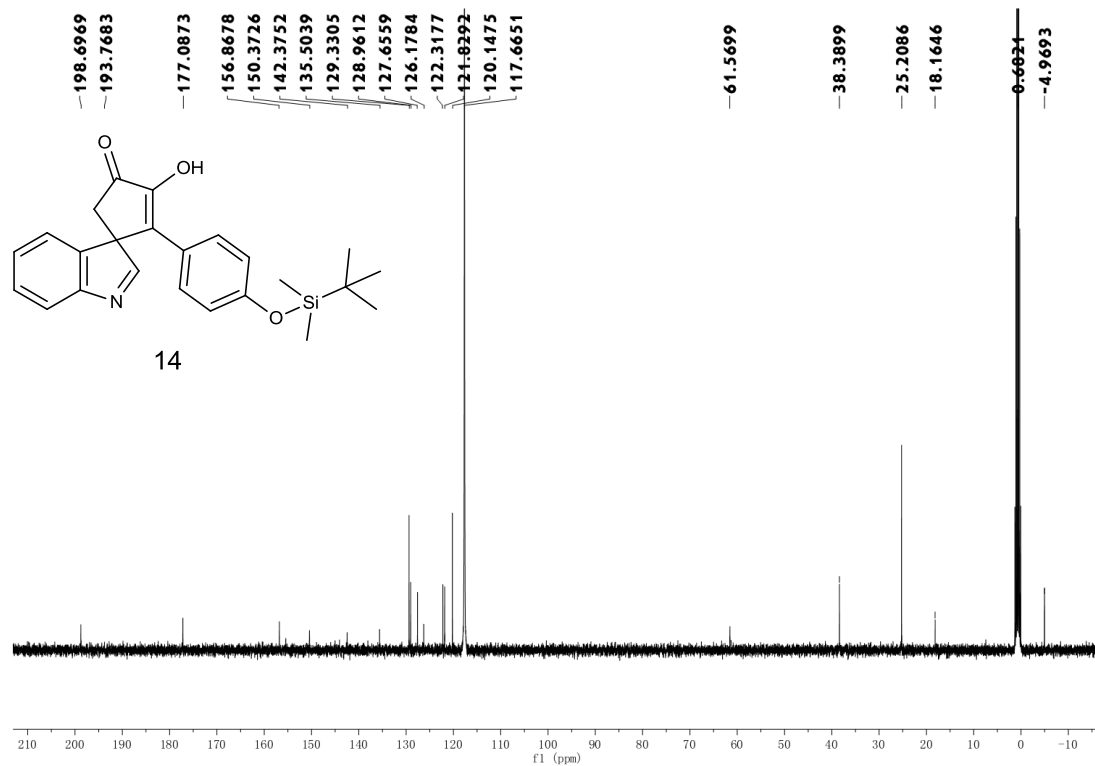

$^1\text{H-NMR}$  Spectrum for Spirobacillene A (**1**) ( $\text{CD}_3\text{CN}$ , 400 MHz)

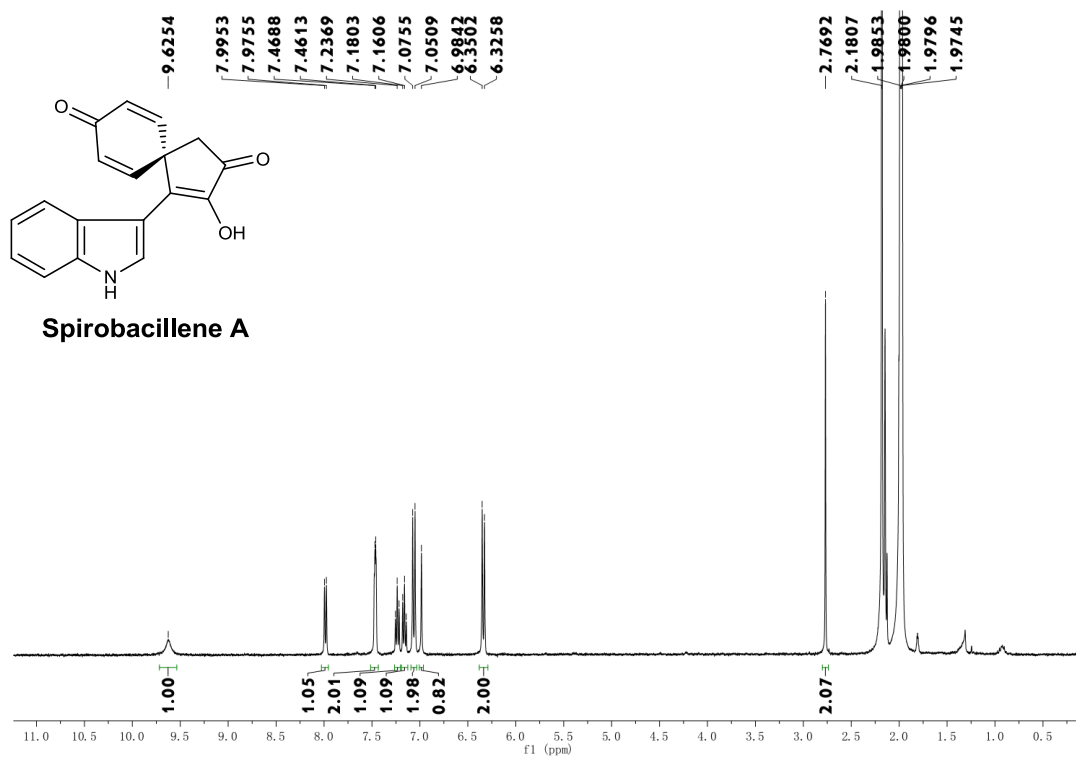

$^{13}\text{C-NMR}$  Spectrum for Spirobacillene A (**1**) ( $\text{CD}_3\text{CN}$ , 101 MHz)

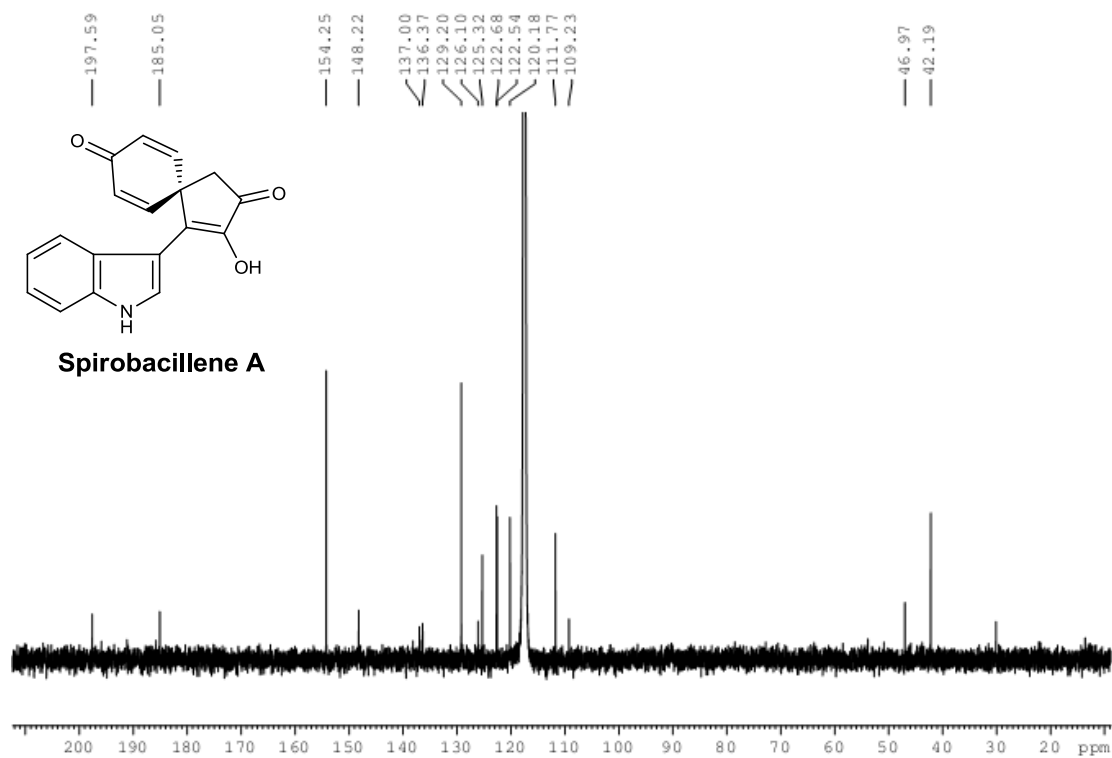

$^1\text{H-NMR}$  Spectrum for Spirobacillene B (**2**) ( $\text{CD}_3\text{CN}$ , 400 MHz)

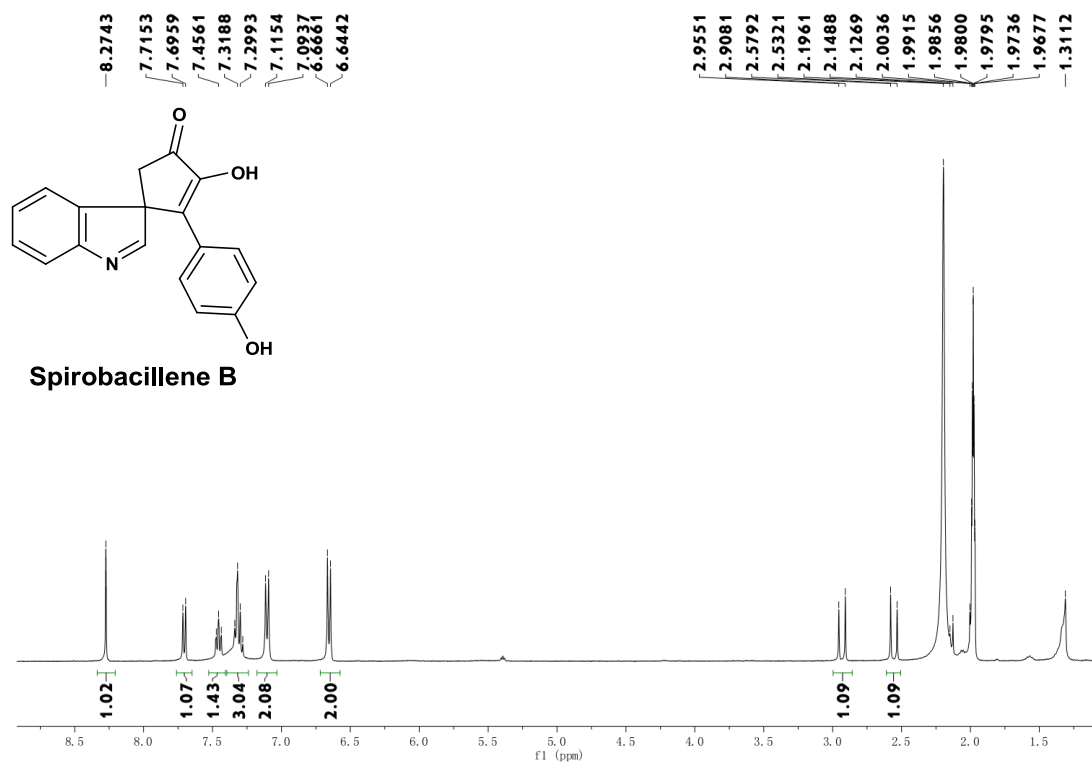

$^{13}\text{C-NMR}$  Spectrum for Spirobacillene B (**2**) ( $\text{CD}_3\text{CN}$ , 150 MHz)

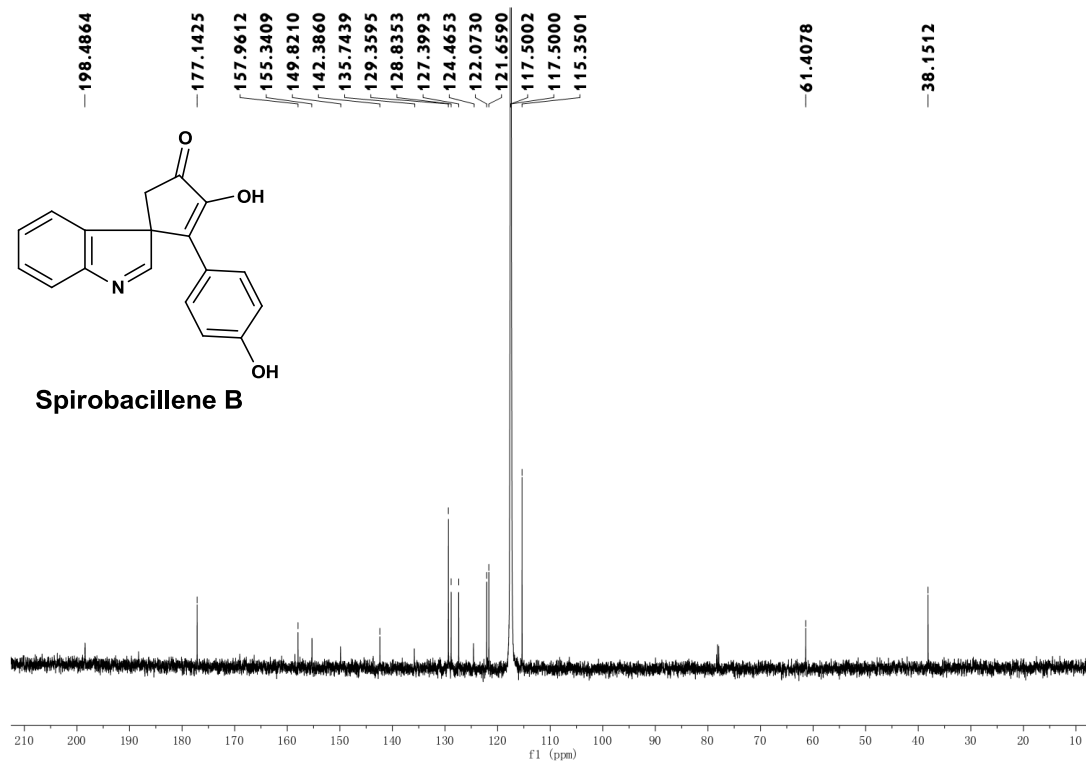

Comparison of NMR spectrum of synthetic spirobacillene A (CD<sub>3</sub>CN, 400 MHz) with that of natural spirobacillene A (CD<sub>3</sub>CN, 500 MHz)

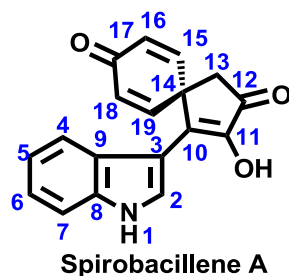

| position | <sup>1</sup> H NMR (δ in ppm, J in Hz) |                          | <sup>13</sup> C NMR (δ in ppm) |           |
|----------|----------------------------------------|--------------------------|--------------------------------|-----------|
|          | Natural                                | Synthetic                | Natural                        | Synthetic |
| 1        | 9.63 br s                              | 9.63 br s                |                                |           |
| 2        | 7.46 m <sup>c</sup>                    | 7.47 m <sup>c</sup>      | 125.3                          | 125.3     |
| 3        |                                        |                          | 109.2                          | 109.2     |
| 4        | 7.98 d (8.0)                           | 7.98 d (7.9)             | 122.5                          | 122.5     |
| 5        | 7.16 ddd (8.0, 7.0, 1.2)               | 7.16 ddd (7.9, 7.2, 1.2) | 120.1                          | 120.2     |
| 6        | 7.23 ddd (8.0, 7.0, 1.2)               | 7.24 ddd (7.9, 7.2, 1.2) | 122.7                          | 122.7     |
| 7        | 7.46 m <sup>c</sup>                    | 7.47 mc                  | 111.7                          | 111.8     |
| 8        |                                        |                          | 136.3                          | 136.4     |
| 9        |                                        |                          | 126.0                          | 126.1     |
| 10       |                                        |                          | 137.0                          | 137.0     |
| 11       |                                        |                          | 148.2                          | 148.2     |
| 12       |                                        |                          | 197.6                          | 197.6     |
| 13       | 2.76 s                                 | 2.77 s                   | 42.1                           | 42.2      |
| 14       |                                        |                          | 47.0                           | 47.0      |
| 15       | 7.06 d (10.0)                          | 7.06 d (9.8)             | 154.2                          | 154.3     |
| 16       | 6.33 d (10.0)                          | 6.34 d (9.8)             | 129.1                          | 129.2     |
| 17       |                                        |                          | 185.0                          | 185.1     |
| 18       | 6.33 d (10.0)                          | 6.34 d (9.8)             | 129.1                          | 129.2     |
| 19       | 7.06 d (10.0)                          | 7.06 d (9.8)             | 154.2                          | 154.3     |

$^1\text{H}$  NMR spectrum ( $\text{CD}_3\text{CN}$ , 500 MHz)

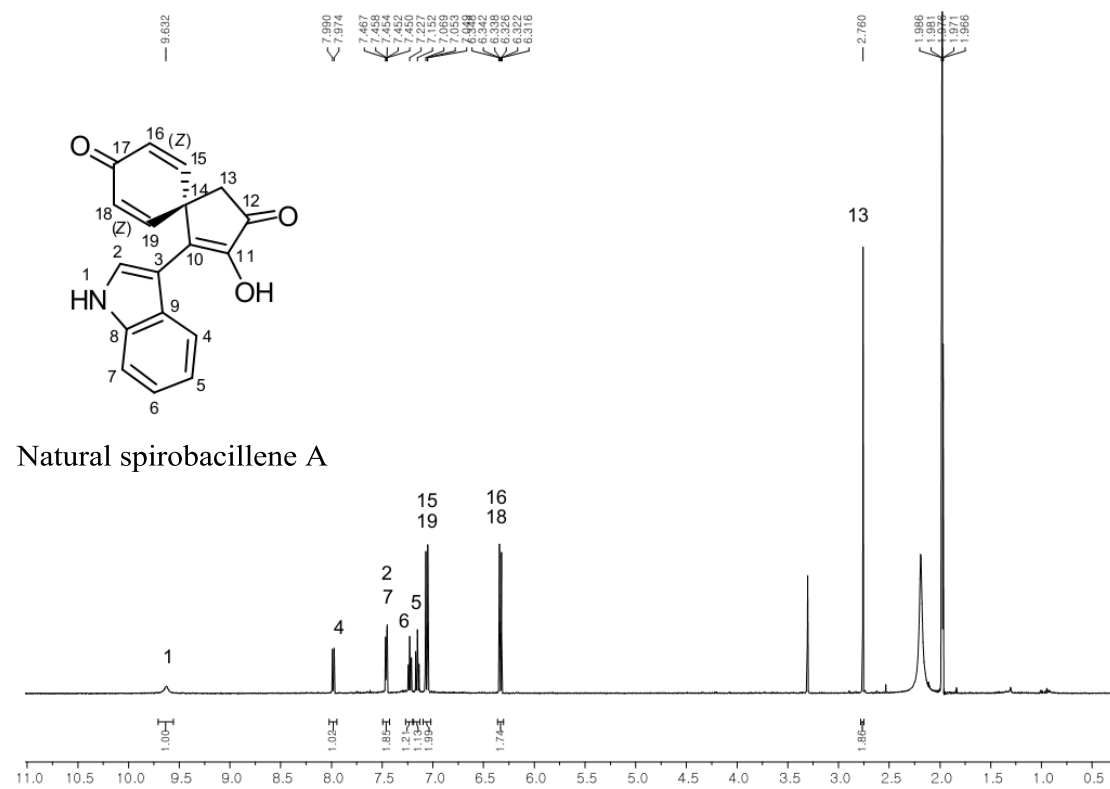

Natural spirobacillene A

$^1\text{H}$  NMR spectrum ( $\text{CD}_3\text{CN}$ , 400 MHz)

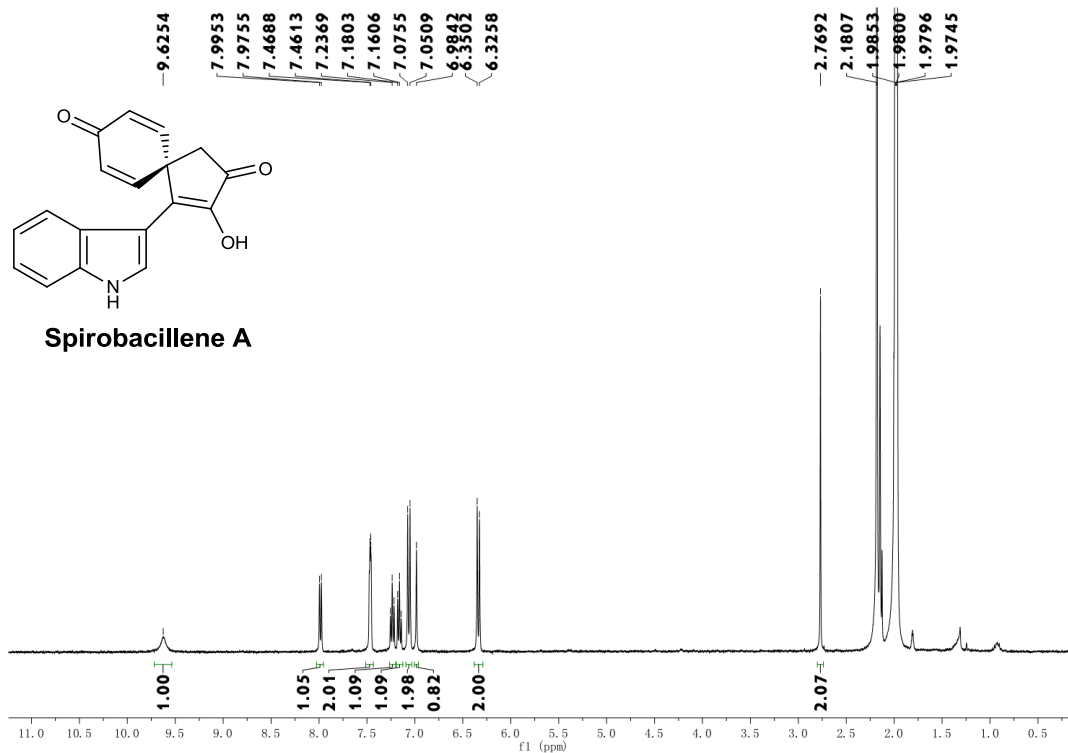

Spirobacillene A



$^{13}\text{C}$  NMR spectrum ( $\text{CD}_3\text{CN}$ , 125 MHz)

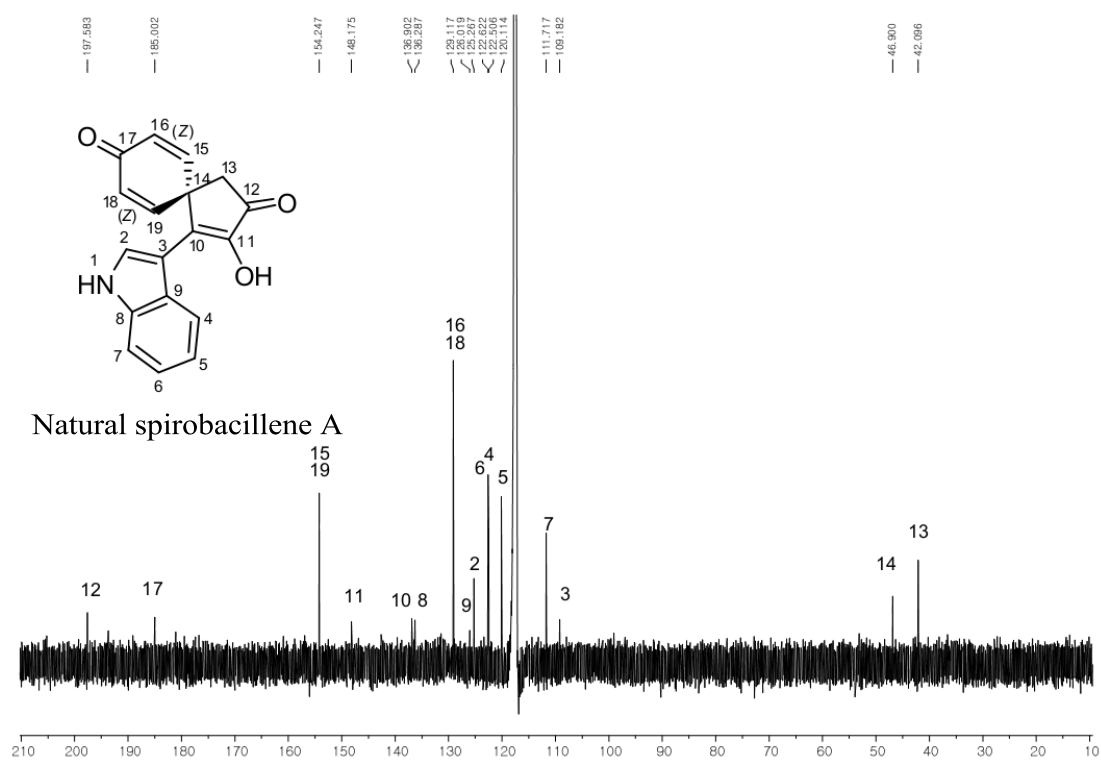

$^{13}\text{C}$  NMR spectrum ( $\text{CD}_3\text{CN}$ , 101 MHz)

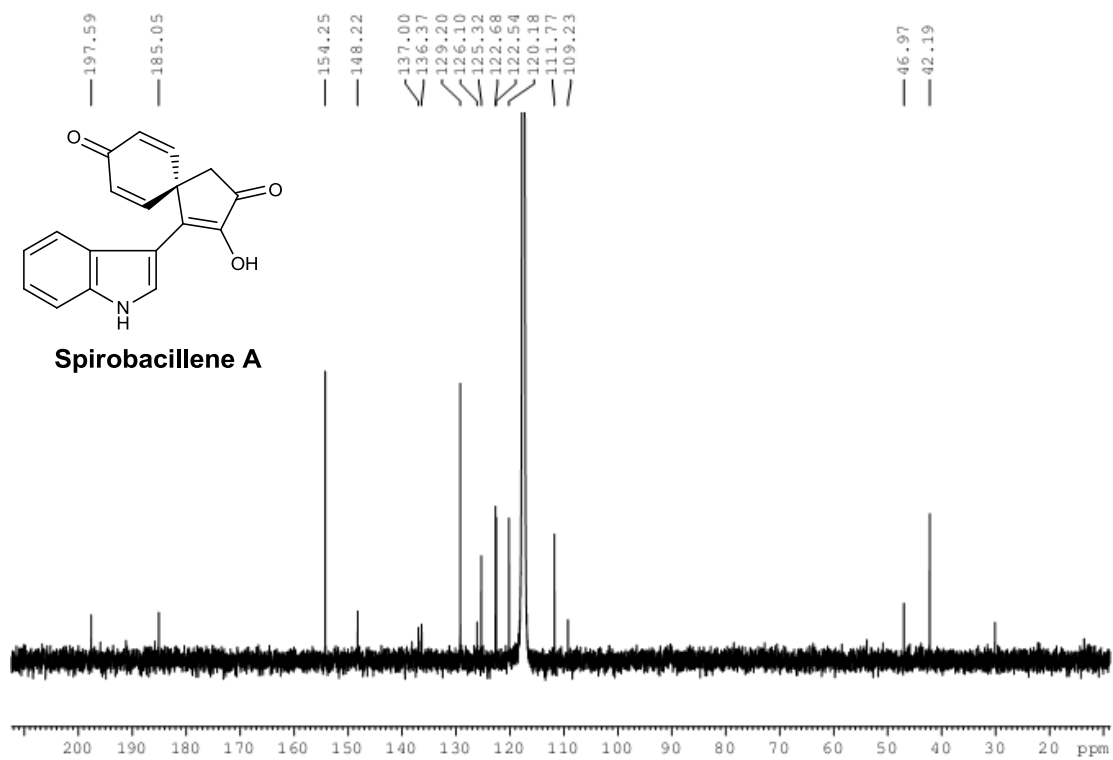

Comparison of NMR spectrum of synthetic spirobacillene B (CD<sub>3</sub>CN, 400 MHz for H-NMR, 150 MHz for C-NMR) with that of natural spirobacillene A (CD<sub>3</sub>CN, 500 MHz)

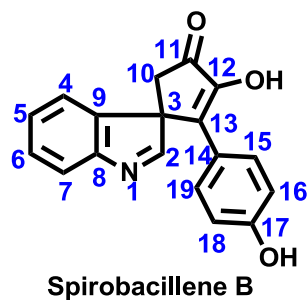

| position | <sup>1</sup> H NMR (δ in ppm, J in Hz) |                          | <sup>13</sup> C NMR (δ in ppm) |           |
|----------|----------------------------------------|--------------------------|--------------------------------|-----------|
|          | Natural                                | Synthetic                | Natural                        | Synthetic |
| 1        |                                        |                          |                                |           |
| 2        | 8.27 s                                 | 8.27 s                   | 177.2                          | 177.1     |
| 3        |                                        |                          | 61.4                           | 61.4      |
| 4        | 7.32 d (7.5)                           | 7.32 d (7.5)             | 122.1                          | 122.1     |
| 5        | 7.30 ddd (7.5, 6.5, 1.5)               | 7.31 ddd (7.5, 6.6, 1.6) | 127.4                          | 127.4     |
| 6        | 7.45 ddd (8.0, 6.5, 1.5)               | 7.45 ddd (7.8, 6.6, 1.6) | 128.9                          | 128.8     |
| 7        | 7.70 d (8.0)                           | 7.71 d (7.8)             | 121.7                          | 121.7     |
| 8        |                                        |                          | 155.3                          | 155.3     |
| 9        |                                        |                          | 142.4                          | 142.4     |
| 10α      | 2.92 d (19.0)                          | 2.93 d (18.8)            | 38.2                           | 38.2      |
| 10β      | 2.55 d (19.0)                          | 2.56 d (18.8)            |                                |           |
| 11       |                                        |                          | 199.0                          | 198.5     |
| 12       |                                        |                          | 150.0                          | 149.8     |
| 13       |                                        |                          | 135.8                          | 135.7     |
| 14       |                                        |                          | 124.6                          | 124.5     |
| 15       | 7.10 d (9.0)                           | 7.10 d (8.7)             | 129.4                          | 129.4     |
| 16       | 6.65 d (9.0)                           | 6.66 d (8.8)             | 115.4                          | 115.4     |
| 17       |                                        |                          | 158.0                          | 158.0     |
| 18       | 6.65 d (9.0)                           | 6.66 d (8.8)             | 115.4                          | 115.4     |
| 19       | 7.10 d (9.0)                           | 7.10 d (8.7)             | 129.4                          | 129.4     |

$^1\text{H}$  NMR spectrum ( $\text{CD}_3\text{CN}$ , 500 MHz)

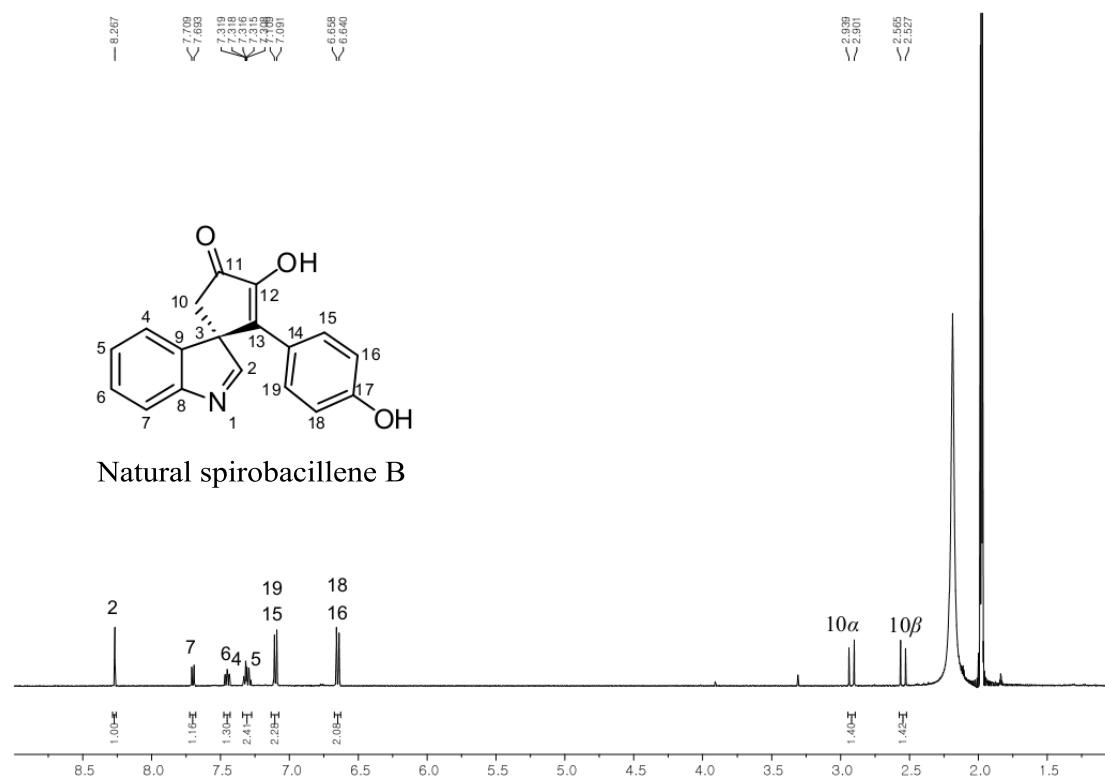

$^1\text{H}$  NMR spectrum ( $\text{CD}_3\text{CN}$ , 400 MHz)

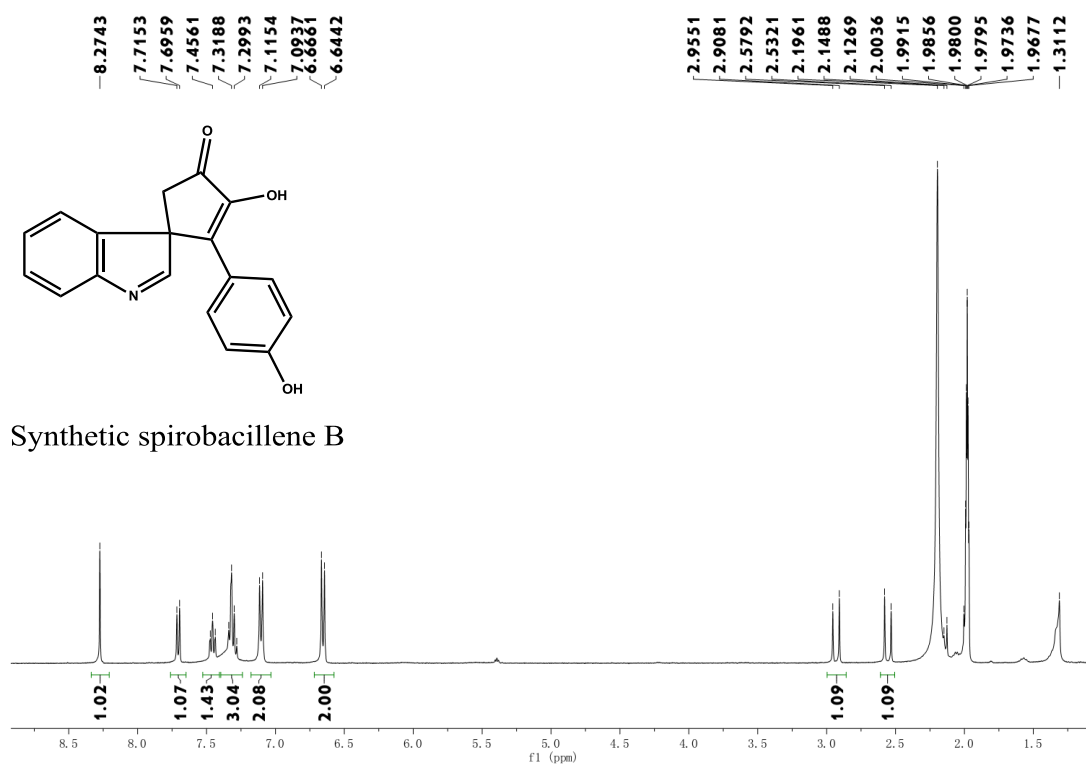

$^1\text{H}$  NMR spectrum ( $\text{CD}_3\text{CN}$ , 500 MHz)

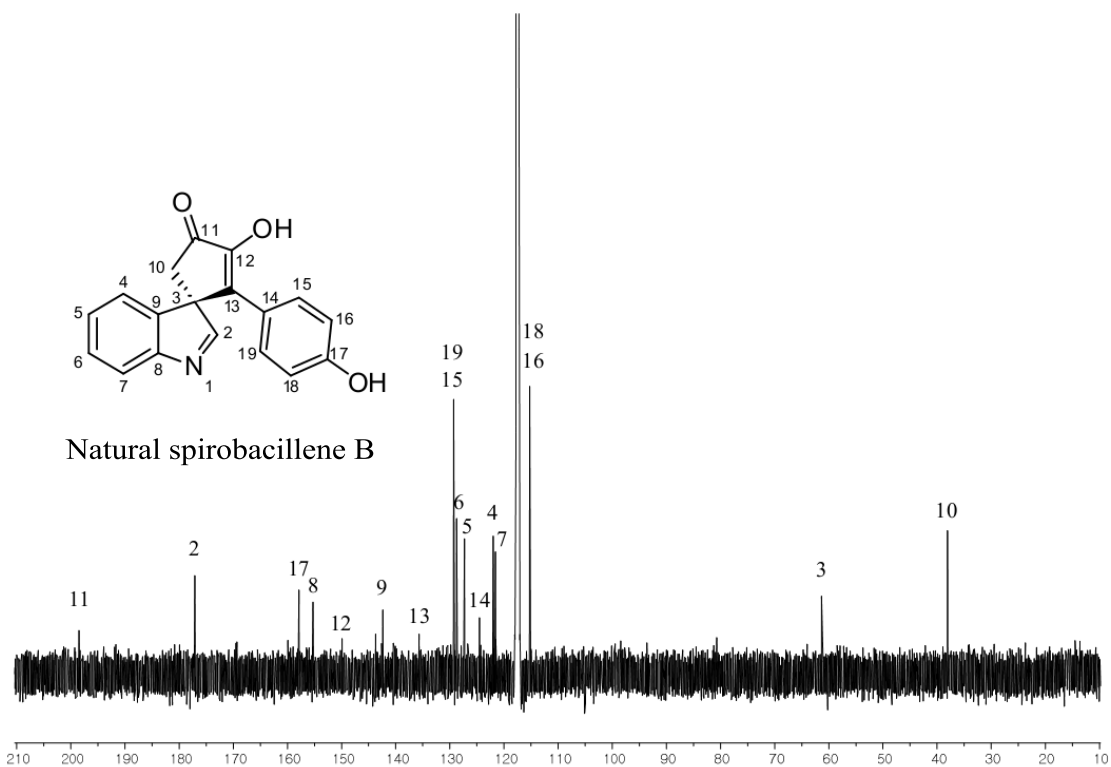

$^{13}\text{C}$  NMR spectrum ( $\text{CD}_3\text{CN}$ , 150 MHz)

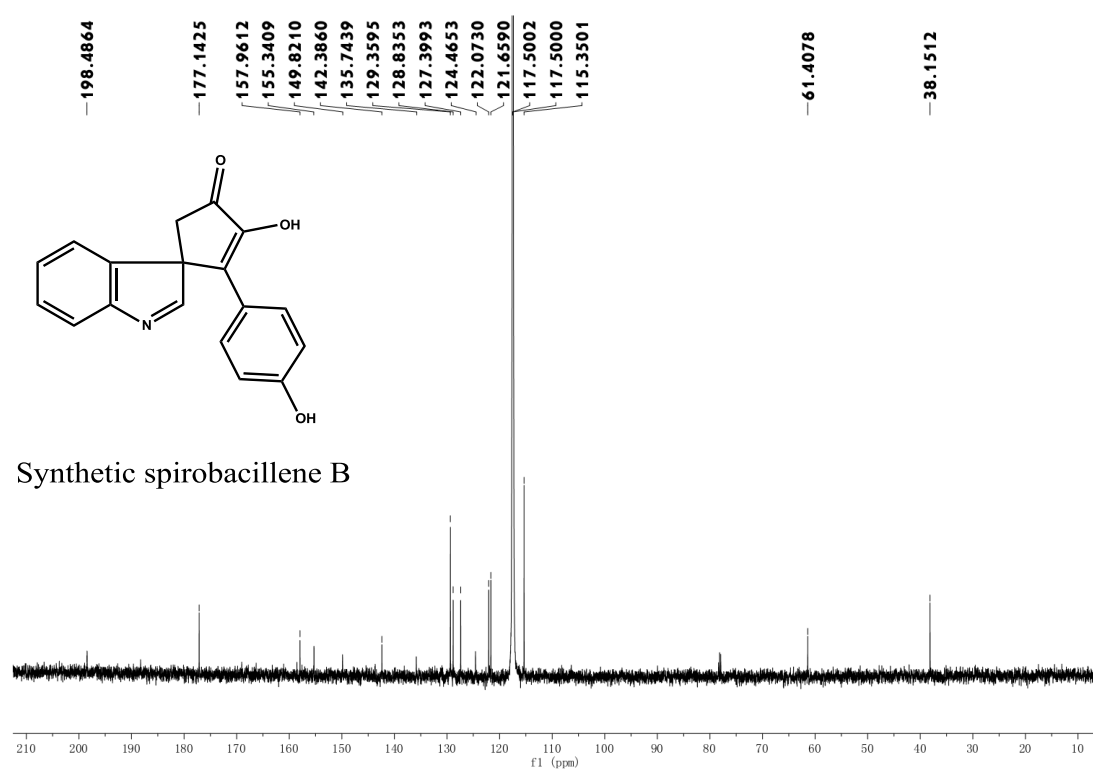

### Part 3: X-ray Crystallographic Studies for Compound 14

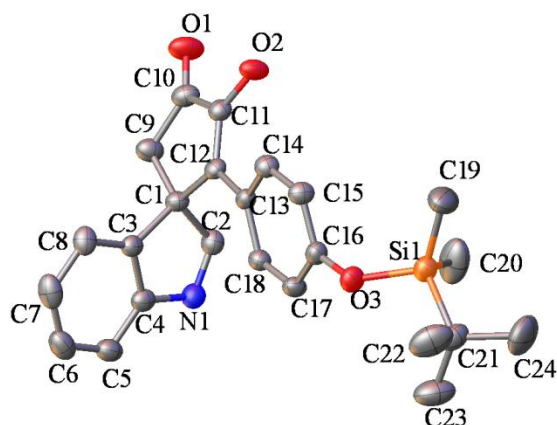

**Figure 1.** X-ray structure of Compound 14

Table 1. Crystal data and structure refinement for sa 2478.

|                                   |                                                     |
|-----------------------------------|-----------------------------------------------------|
| Identification code               | sa2478                                              |
| Empirical formula                 | C <sub>24</sub> H <sub>27</sub> N O <sub>3</sub> Si |
| Formula weight                    | 405.56                                              |
| Temperature                       | 173(2) K                                            |
| Wavelength                        | 0.71073 Å                                           |
| Crystal system, space group       | Orthorhombic, P2(1)2(1)2(1)                         |
| Unit cell dimensions              | a = 11.284(3) Å    alpha = 90 deg.                  |
| b = 14.658(3) Å    beta = 90 deg. | c = 27.222(7) Å    gamma = 90 deg.                  |
| Volume                            | 4502.4(18) Å <sup>3</sup>                           |
| Z, Calculated density             | 8, 1.197 Mg/m <sup>3</sup>                          |
| Absorption coefficient            | 0.128 mm <sup>-1</sup>                              |
| F(000)                            | 1728                                                |
| Crystal size                      | 0.48 x 0.28 x 0.09 mm                               |
| Theta range for data collection   | 1.95 to 27.47 deg.                                  |
| Limiting indices                  | -14 ≤ h ≤ 14, -18 ≤ k ≤ 18, -35 ≤ l ≤ 35            |
| Reflections collected / unique    | 44582 / 5686 [R(int) = 0.0670]                      |
| Completeness to theta = 27.47     | 99.6 %                                              |
| Absorption correction             | Semi-empirical from equivalents                     |
| Max. and min. transmission        | 1.0000 and 0.6035                                   |
| Refinement method                 | Full-matrix least-squares on F <sup>2</sup>         |
| Data / restraints / parameters    | 5686 / 0 / 535                                      |
| Goodness-of-fit on F <sup>2</sup> | 1.274                                               |
| Final R indices [I > 2σ(I)]       | R1 = 0.0575, wR2 = 0.1275                           |
| R indices (all data)              | R1 = 0.0594, wR2 = 0.1284                           |
| Absolute structure parameter      | -10(10)                                             |
| Largest diff. peak and hole       | 0.284 and -0.278 e.Å <sup>-3</sup>                  |

Table 2. Atomic coordinates ( $\times 10^4$ ) and equivalent isotropic displacement parameters ( $\text{Å}^2 \times 10^3$ ) for sa2478.  
U(eq) is defined as one third of the trace of the orthogonalized Uij tensor.

|       | x        | y       | z       | U(eq) |
|-------|----------|---------|---------|-------|
| Si(1) | 2556(1)  | 5678(1) | 4831(1) | 38(1) |
| Si(2) | 6942(1)  | 3526(1) | 5432(1) | 29(1) |
| O(1)  | -630(3)  | 2267(2) | 2117(1) | 49(1) |
| O(2)  | 536(3)   | 2557(2) | 3053(1) | 37(1) |
| O(3)  | 3287(2)  | 5591(2) | 4303(1) | 34(1) |
| O(4)  | 10797(3) | 7807(2) | 7847(1) | 48(1) |
| O(5)  | 9661(3)  | 7500(2) | 6899(1) | 41(1) |
| O(6)  | 6554(2)  | 4453(2) | 5747(1) | 35(1) |
| N(1)  | 597(3)   | 5929(2) | 1973(1) | 32(1) |
| N(2)  | 9394(3)  | 4203(2) | 8038(1) | 33(1) |
| C(1)  | 1018(3)  | 4374(2) | 2145(1) | 28(1) |
| C(2)  | 199(3)   | 5195(2) | 2167(1) | 32(1) |
| C(3)  | 2067(3)  | 4823(2) | 1901(1) | 27(1) |
| C(4)  | 1771(3)  | 5727(2) | 1804(1) | 31(1) |
| C(5)  | 2544(4)  | 6320(3) | 1576(1) | 38(1) |
| C(6)  | 3650(4)  | 5988(3) | 1444(2) | 45(1) |
| C(7)  | 3948(3)  | 5095(3) | 1533(1) | 44(1) |
| C(8)  | 3170(3)  | 4490(3) | 1765(1) | 34(1) |
| C(9)  | 421(4)   | 3615(3) | 1828(1) | 36(1) |
| C(10) | 47(3)    | 2897(2) | 2192(1) | 33(1) |
| C(11) | 646(3)   | 3102(2) | 2663(1) | 28(1) |
| C(12) | 1213(3)  | 3916(2) | 2643(1) | 26(1) |
| C(13) | 1850(3)  | 4350(2) | 3050(1) | 25(1) |
| C(14) | 2273(3)  | 3821(2) | 3444(1) | 30(1) |
| C(15) | 2768(3)  | 4235(2) | 3857(1) | 32(1) |
| C(16) | 2838(3)  | 5182(2) | 3889(1) | 30(1) |
| C(17) | 2469(3)  | 5714(2) | 3496(1) | 31(1) |
| C(18) | 1980(3)  | 5301(2) | 3082(1) | 28(1) |
| C(19) | 2739(6)  | 4626(3) | 5210(2) | 71(2) |
| C(20) | 960(4)   | 5843(5) | 4681(2) | 79(2) |
| C(21) | 3222(4)  | 6692(3) | 5144(1) | 42(1) |
| C(22) | 4520(5)  | 6514(4) | 5274(2) | 72(2) |
| C(23) | 3144(5)  | 7522(3) | 4805(2) | 66(1) |
| C(24) | 2516(6)  | 6898(4) | 5616(2) | 81(2) |
| C(25) | 9052(3)  | 5760(2) | 7837(1) | 26(1) |
| C(26) | 9846(3)  | 4920(2) | 7841(1) | 30(1) |
| C(27) | 7962(3)  | 5346(2) | 8071(1) | 27(1) |

|       |          |         |         |       |
|-------|----------|---------|---------|-------|
| C(28) | 8211(3)  | 4435(2) | 8183(1) | 30(1) |
| C(29) | 7392(4)  | 3865(3) | 8391(1) | 44(1) |
| C(30) | 6285(4)  | 4224(4) | 8497(2) | 52(1) |
| C(31) | 6035(4)  | 5135(3) | 8401(1) | 46(1) |
| C(32) | 6865(3)  | 5703(3) | 8183(1) | 35(1) |
| C(33) | 9632(3)  | 6532(3) | 8146(1) | 34(1) |
| C(34) | 10088(3) | 7198(2) | 7772(1) | 33(1) |
| C(35) | 9516(3)  | 6982(2) | 7302(1) | 29(1) |
| C(36) | 8908(3)  | 6187(2) | 7324(1) | 26(1) |
| C(37) | 8257(3)  | 5736(2) | 6926(1) | 25(1) |
| C(38) | 7900(3)  | 6218(2) | 6504(1) | 33(1) |
| C(39) | 7341(3)  | 5785(2) | 6120(1) | 35(1) |
| C(40) | 7118(3)  | 4852(2) | 6140(1) | 28(1) |
| C(41) | 7432(3)  | 4365(2) | 6554(1) | 29(1) |
| C(42) | 8000(3)  | 4802(2) | 6941(1) | 27(1) |
| C(43) | 8441(4)  | 3134(3) | 5628(2) | 41(1) |
| C(44) | 5778(4)  | 2660(3) | 5547(2) | 48(1) |
| C(45) | 6977(4)  | 3890(3) | 4770(1) | 39(1) |
| C(46) | 7917(6)  | 4624(4) | 4713(2) | 85(2) |
| C(47) | 7295(5)  | 3084(4) | 4438(2) | 63(1) |
| C(48) | 5789(5)  | 4261(4) | 4610(2) | 65(1) |

---

Table 3. Bond lengths [Å] and angles [deg] for sa2478.

---

|             |          |
|-------------|----------|
| Si(1)-O(3)  | 1.662(3) |
| Si(1)-C(20) | 1.862(5) |
| Si(1)-C(19) | 1.867(5) |
| Si(1)-C(21) | 1.871(4) |
| Si(2)-O(6)  | 1.664(3) |
| Si(2)-C(44) | 1.853(4) |
| Si(2)-C(43) | 1.865(4) |
| Si(2)-C(45) | 1.880(4) |
| O(1)-C(10)  | 1.217(4) |
| O(2)-C(11)  | 1.334(4) |
| O(2)-H(2)   | 0.8400   |
| O(3)-C(16)  | 1.374(4) |
| O(4)-C(34)  | 1.216(4) |
| O(5)-C(35)  | 1.344(4) |
| O(5)-H(5)   | 0.8400   |
| O(6)-C(40)  | 1.377(4) |
| N(1)-C(2)   | 1.281(5) |
| N(1)-C(4)   | 1.433(5) |

|              |          |
|--------------|----------|
| N(2)-C(26)   | 1.286(4) |
| N(2)-C(28)   | 1.433(5) |
| C(1)-C(3)    | 1.508(5) |
| C(1)-C(2)    | 1.519(5) |
| C(1)-C(12)   | 1.528(4) |
| C(1)-C(9)    | 1.560(5) |
| C(2)-H(2A)   | 0.9500   |
| C(3)-C(8)    | 1.387(5) |
| C(3)-C(4)    | 1.392(5) |
| C(4)-C(5)    | 1.379(5) |
| C(5)-C(6)    | 1.387(6) |
| C(5)-H(5A)   | 0.9500   |
| C(6)-C(7)    | 1.372(6) |
| C(6)-H(6)    | 0.9500   |
| C(7)-C(8)    | 1.398(5) |
| C(7)-H(7)    | 0.9500   |
| C(8)-H(8)    | 0.9500   |
| C(9)-C(10)   | 1.507(5) |
| C(9)-H(9A)   | 0.9900   |
| C(9)-H(9B)   | 0.9900   |
| C(10)-C(11)  | 1.478(5) |
| C(11)-C(12)  | 1.356(5) |
| C(12)-C(13)  | 1.467(4) |
| C(13)-C(18)  | 1.404(4) |
| C(13)-C(14)  | 1.405(4) |
| C(14)-C(15)  | 1.395(5) |
| C(14)-H(14)  | 0.9500   |
| C(15)-C(16)  | 1.393(5) |
| C(15)-H(15)  | 0.9500   |
| C(16)-C(17)  | 1.387(5) |
| C(17)-C(18)  | 1.395(5) |
| C(17)-H(17)  | 0.9500   |
| C(18)-H(18)  | 0.9500   |
| C(19)-H(19A) | 0.9800   |
| C(19)-H(19B) | 0.9800   |
| C(19)-H(19C) | 0.9800   |
| C(20)-H(20A) | 0.9800   |
| C(20)-H(20B) | 0.9800   |
| C(20)-H(20C) | 0.9800   |
| C(21)-C(22)  | 1.530(6) |
| C(21)-C(23)  | 1.531(6) |
| C(21)-C(24)  | 1.541(6) |
| C(22)-H(22A) | 0.9800   |
| C(22)-H(22B) | 0.9800   |



|              |          |
|--------------|----------|
| C(22)-H(22C) | 0.9800   |
| C(23)-H(23A) | 0.9800   |
| C(23)-H(23B) | 0.9800   |
| C(23)-H(23C) | 0.9800   |
| C(24)-H(24A) | 0.9800   |
| C(24)-H(24B) | 0.9800   |
| C(24)-H(24C) | 0.9800   |
| C(25)-C(27)  | 1.512(5) |
| C(25)-C(26)  | 1.522(5) |
| C(25)-C(36)  | 1.539(4) |
| C(25)-C(33)  | 1.554(5) |
| C(26)-H(26)  | 0.9500   |
| C(27)-C(32)  | 1.378(5) |
| C(27)-C(28)  | 1.398(5) |
| C(28)-C(29)  | 1.368(5) |
| C(29)-C(30)  | 1.386(6) |
| C(29)-H(29)  | 0.9500   |
| C(30)-C(31)  | 1.391(7) |
| C(30)-H(30)  | 0.9500   |
| C(31)-C(32)  | 1.387(6) |
| C(31)-H(31)  | 0.9500   |
| C(32)-H(32)  | 0.9500   |
| C(33)-C(34)  | 1.501(5) |
| C(33)-H(33A) | 0.9900   |
| C(33)-H(33B) | 0.9900   |
| C(34)-C(35)  | 1.468(5) |
| C(35)-C(36)  | 1.354(5) |
| C(36)-C(37)  | 1.467(4) |
| C(37)-C(42)  | 1.400(4) |
| C(37)-C(38)  | 1.407(4) |
| C(38)-C(39)  | 1.375(5) |
| C(38)-H(38)  | 0.9500   |
| C(39)-C(40)  | 1.391(5) |
| C(39)-H(39)  | 0.9500   |
| C(40)-C(41)  | 1.380(5) |
| C(41)-C(42)  | 1.390(4) |
| C(41)-H(41)  | 0.9500   |
| C(42)-H(42)  | 0.9500   |
| C(43)-H(43A) | 0.9800   |
| C(43)-H(43B) | 0.9800   |
| C(43)-H(43C) | 0.9800   |
| C(44)-H(44A) | 0.9800   |
| C(44)-H(44B) | 0.9800   |
| C(44)-H(44C) | 0.9800   |

|                   |            |
|-------------------|------------|
| C(45)-C(48)       | 1.511(6)   |
| C(45)-C(46)       | 1.517(7)   |
| C(45)-C(47)       | 1.531(6)   |
| C(46)-H(46A)      | 0.9800     |
| C(46)-H(46B)      | 0.9800     |
| C(46)-H(46C)      | 0.9800     |
| C(47)-H(47A)      | 0.9800     |
| C(47)-H(47B)      | 0.9800     |
| C(47)-H(47C)      | 0.9800     |
| C(48)-H(48A)      | 0.9800     |
| C(48)-H(48B)      | 0.9800     |
| C(48)-H(48C)      | 0.9800     |
| O(3)-Si(1)-C(20)  | 107.5(2)   |
| O(3)-Si(1)-C(19)  | 111.12(19) |
| C(20)-Si(1)-C(19) | 109.6(3)   |
| O(3)-Si(1)-C(21)  | 104.77(17) |
| C(20)-Si(1)-C(21) | 112.6(2)   |
| C(19)-Si(1)-C(21) | 111.1(2)   |
| O(6)-Si(2)-C(44)  | 106.62(17) |
| O(6)-Si(2)-C(43)  | 110.08(16) |
| C(44)-Si(2)-C(43) | 112.6(2)   |
| O(6)-Si(2)-C(45)  | 105.47(15) |
| C(44)-Si(2)-C(45) | 111.84(19) |
| C(43)-Si(2)-C(45) | 109.97(19) |
| C(11)-O(2)-H(2)   | 109.5      |
| C(16)-O(3)-Si(1)  | 124.0(2)   |
| C(35)-O(5)-H(5)   | 109.5      |
| C(40)-O(6)-Si(2)  | 128.7(2)   |
| C(2)-N(1)-C(4)    | 106.4(3)   |
| C(26)-N(2)-C(28)  | 106.9(3)   |
| C(3)-C(1)-C(2)    | 98.7(3)    |
| C(3)-C(1)-C(12)   | 118.0(3)   |
| C(2)-C(1)-C(12)   | 113.5(3)   |
| C(3)-C(1)-C(9)    | 114.0(3)   |
| C(2)-C(1)-C(9)    | 108.9(3)   |
| C(12)-C(1)-C(9)   | 103.8(3)   |
| N(1)-C(2)-C(1)    | 115.8(3)   |
| N(1)-C(2)-H(2A)   | 122.1      |
| C(1)-C(2)-H(2A)   | 122.1      |
| C(8)-C(3)-C(4)    | 120.0(3)   |
| C(8)-C(3)-C(1)    | 132.0(3)   |
| C(4)-C(3)-C(1)    | 108.1(3)   |
| C(5)-C(4)-C(3)    | 122.2(3)   |

|                   |          |
|-------------------|----------|
| C(5)-C(4)-N(1)    | 126.8(3) |
| C(3)-C(4)-N(1)    | 111.0(3) |
| C(4)-C(5)-C(6)    | 117.7(4) |
| C(4)-C(5)-H(5A)   | 121.1    |
| C(6)-C(5)-H(5A)   | 121.1    |
| C(7)-C(6)-C(5)    | 120.6(4) |
| C(7)-C(6)-H(6)    | 119.7    |
| C(5)-C(6)-H(6)    | 119.7    |
| C(6)-C(7)-C(8)    | 122.1(4) |
| C(6)-C(7)-H(7)    | 119.0    |
| C(8)-C(7)-H(7)    | 119.0    |
| C(3)-C(8)-C(7)    | 117.4(4) |
| C(3)-C(8)-H(8)    | 121.3    |
| C(7)-C(8)-H(8)    | 121.3    |
| C(10)-C(9)-C(1)   | 104.8(3) |
| C(10)-C(9)-H(9A)  | 110.8    |
| C(1)-C(9)-H(9A)   | 110.8    |
| C(10)-C(9)-H(9B)  | 110.8    |
| C(1)-C(9)-H(9B)   | 110.8    |
| H(9A)-C(9)-H(9B)  | 108.9    |
| O(1)-C(10)-C(11)  | 126.0(4) |
| O(1)-C(10)-C(9)   | 126.5(3) |
| C(11)-C(10)-C(9)  | 107.5(3) |
| O(2)-C(11)-C(12)  | 127.1(3) |
| O(2)-C(11)-C(10)  | 121.7(3) |
| C(12)-C(11)-C(10) | 111.0(3) |
| C(11)-C(12)-C(13) | 125.6(3) |
| C(11)-C(12)-C(1)  | 110.8(3) |
| C(13)-C(12)-C(1)  | 123.4(3) |
| C(18)-C(13)-C(14) | 117.7(3) |
| C(18)-C(13)-C(12) | 121.8(3) |
| C(14)-C(13)-C(12) | 120.3(3) |
| C(15)-C(14)-C(13) | 120.8(3) |
| C(15)-C(14)-H(14) | 119.6    |
| C(13)-C(14)-H(14) | 119.6    |
| C(16)-C(15)-C(14) | 120.4(3) |
| C(16)-C(15)-H(15) | 119.8    |
| C(14)-C(15)-H(15) | 119.8    |
| O(3)-C(16)-C(17)  | 119.8(3) |
| O(3)-C(16)-C(15)  | 120.5(3) |
| C(17)-C(16)-C(15) | 119.7(3) |
| C(16)-C(17)-C(18) | 119.9(3) |
| C(16)-C(17)-H(17) | 120.1    |
| C(18)-C(17)-H(17) | 120.1    |

|                     |          |
|---------------------|----------|
| C(17)-C(18)-C(13)   | 121.4(3) |
| C(17)-C(18)-H(18)   | 119.3    |
| C(13)-C(18)-H(18)   | 119.3    |
| Si(1)-C(19)-H(19A)  | 109.5    |
| Si(1)-C(19)-H(19B)  | 109.5    |
| H(19A)-C(19)-H(19B) | 109.5    |
| Si(1)-C(19)-H(19C)  | 109.5    |
| H(19A)-C(19)-H(19C) | 109.5    |
| H(19B)-C(19)-H(19C) | 109.5    |
| Si(1)-C(20)-H(20A)  | 109.5    |
| Si(1)-C(20)-H(20B)  | 109.5    |
| H(20A)-C(20)-H(20B) | 109.5    |
| Si(1)-C(20)-H(20C)  | 109.5    |
| H(20A)-C(20)-H(20C) | 109.5    |
| H(20B)-C(20)-H(20C) | 109.5    |
| C(22)-C(21)-C(23)   | 109.3(4) |
| C(22)-C(21)-C(24)   | 109.6(4) |
| C(23)-C(21)-C(24)   | 108.5(4) |
| C(22)-C(21)-Si(1)   | 110.8(3) |
| C(23)-C(21)-Si(1)   | 109.5(3) |
| C(24)-C(21)-Si(1)   | 109.1(3) |
| C(21)-C(22)-H(22A)  | 109.5    |
| C(21)-C(22)-H(22B)  | 109.5    |
| H(22A)-C(22)-H(22B) | 109.5    |
| C(21)-C(22)-H(22C)  | 109.5    |
| H(22A)-C(22)-H(22C) | 109.5    |
| H(22B)-C(22)-H(22C) | 109.5    |
| C(21)-C(23)-H(23A)  | 109.5    |
| C(21)-C(23)-H(23B)  | 109.5    |
| H(23A)-C(23)-H(23B) | 109.5    |
| C(21)-C(23)-H(23C)  | 109.5    |
| H(23A)-C(23)-H(23C) | 109.5    |
| H(23B)-C(23)-H(23C) | 109.5    |
| C(21)-C(24)-H(24A)  | 109.5    |
| C(21)-C(24)-H(24B)  | 109.5    |
| H(24A)-C(24)-H(24B) | 109.5    |
| C(21)-C(24)-H(24C)  | 109.5    |
| H(24A)-C(24)-H(24C) | 109.5    |
| H(24B)-C(24)-H(24C) | 109.5    |
| C(27)-C(25)-C(26)   | 98.7(3)  |
| C(27)-C(25)-C(36)   | 117.3(3) |
| C(26)-C(25)-C(36)   | 113.4(3) |
| C(27)-C(25)-C(33)   | 114.0(3) |
| C(26)-C(25)-C(33)   | 109.8(3) |

|                     |          |
|---------------------|----------|
| C(36)-C(25)-C(33)   | 103.8(3) |
| N(2)-C(26)-C(25)    | 115.5(3) |
| N(2)-C(26)-H(26)    | 122.2    |
| C(25)-C(26)-H(26)   | 122.2    |
| C(32)-C(27)-C(28)   | 119.6(3) |
| C(32)-C(27)-C(25)   | 132.2(3) |
| C(28)-C(27)-C(25)   | 108.1(3) |
| C(29)-C(28)-C(27)   | 122.6(4) |
| C(29)-C(28)-N(2)    | 126.7(3) |
| C(27)-C(28)-N(2)    | 110.7(3) |
| C(28)-C(29)-C(30)   | 117.6(4) |
| C(28)-C(29)-H(29)   | 121.2    |
| C(30)-C(29)-H(29)   | 121.2    |
| C(29)-C(30)-C(31)   | 120.5(4) |
| C(29)-C(30)-H(30)   | 119.7    |
| C(31)-C(30)-H(30)   | 119.7    |
| C(32)-C(31)-C(30)   | 121.4(4) |
| C(32)-C(31)-H(31)   | 119.3    |
| C(30)-C(31)-H(31)   | 119.3    |
| C(27)-C(32)-C(31)   | 118.3(4) |
| C(27)-C(32)-H(32)   | 120.9    |
| C(31)-C(32)-H(32)   | 120.9    |
| C(34)-C(33)-C(25)   | 104.6(3) |
| C(34)-C(33)-H(33A)  | 110.8    |
| C(25)-C(33)-H(33A)  | 110.8    |
| C(34)-C(33)-H(33B)  | 110.8    |
| C(25)-C(33)-H(33B)  | 110.8    |
| H(33A)-C(33)-H(33B) | 108.9    |
| O(4)-C(34)-C(35)    | 126.5(3) |
| O(4)-C(34)-C(33)    | 126.1(3) |
| C(35)-C(34)-C(33)   | 107.5(3) |
| O(5)-C(35)-C(36)    | 125.8(3) |
| O(5)-C(35)-C(34)    | 122.4(3) |
| C(36)-C(35)-C(34)   | 111.6(3) |
| C(35)-C(36)-C(37)   | 127.5(3) |
| C(35)-C(36)-C(25)   | 109.8(3) |
| C(37)-C(36)-C(25)   | 122.7(3) |
| C(42)-C(37)-C(38)   | 117.1(3) |
| C(42)-C(37)-C(36)   | 121.5(3) |
| C(38)-C(37)-C(36)   | 121.3(3) |
| C(39)-C(38)-C(37)   | 121.3(3) |
| C(39)-C(38)-H(38)   | 119.3    |
| C(37)-C(38)-H(38)   | 119.3    |
| C(38)-C(39)-C(40)   | 120.4(3) |

|                     |          |
|---------------------|----------|
| C(38)-C(39)-H(39)   | 119.8    |
| C(40)-C(39)-H(39)   | 119.8    |
| O(6)-C(40)-C(41)    | 122.2(3) |
| O(6)-C(40)-C(39)    | 118.1(3) |
| C(41)-C(40)-C(39)   | 119.6(3) |
| C(40)-C(41)-C(42)   | 119.9(3) |
| C(40)-C(41)-H(41)   | 120.1    |
| C(42)-C(41)-H(41)   | 120.1    |
| C(41)-C(42)-C(37)   | 121.6(3) |
| C(41)-C(42)-H(42)   | 119.2    |
| C(37)-C(42)-H(42)   | 119.2    |
| Si(2)-C(43)-H(43A)  | 109.5    |
| Si(2)-C(43)-H(43B)  | 109.5    |
| H(43A)-C(43)-H(43B) | 109.5    |
| Si(2)-C(43)-H(43C)  | 109.5    |
| H(43A)-C(43)-H(43C) | 109.5    |
| H(43B)-C(43)-H(43C) | 109.5    |
| Si(2)-C(44)-H(44A)  | 109.5    |
| Si(2)-C(44)-H(44B)  | 109.5    |
| H(44A)-C(44)-H(44B) | 109.5    |
| Si(2)-C(44)-H(44C)  | 109.5    |
| H(44A)-C(44)-H(44C) | 109.5    |
| H(44B)-C(44)-H(44C) | 109.5    |
| C(48)-C(45)-C(46)   | 109.6(4) |
| C(48)-C(45)-C(47)   | 108.3(4) |
| C(46)-C(45)-C(47)   | 108.8(4) |
| C(48)-C(45)-Si(2)   | 111.1(3) |
| C(46)-C(45)-Si(2)   | 108.3(3) |
| C(47)-C(45)-Si(2)   | 110.6(3) |
| C(45)-C(46)-H(46A)  | 109.5    |
| C(45)-C(46)-H(46B)  | 109.5    |
| H(46A)-C(46)-H(46B) | 109.5    |
| C(45)-C(46)-H(46C)  | 109.5    |
| H(46A)-C(46)-H(46C) | 109.5    |
| H(46B)-C(46)-H(46C) | 109.5    |
| C(45)-C(47)-H(47A)  | 109.5    |
| C(45)-C(47)-H(47B)  | 109.5    |
| H(47A)-C(47)-H(47B) | 109.5    |
| C(45)-C(47)-H(47C)  | 109.5    |
| H(47A)-C(47)-H(47C) | 109.5    |
| H(47B)-C(47)-H(47C) | 109.5    |
| C(45)-C(48)-H(48A)  | 109.5    |
| C(45)-C(48)-H(48B)  | 109.5    |
| H(48A)-C(48)-H(48B) | 109.5    |

|                     |       |
|---------------------|-------|
| C(45)-C(48)-H(48C)  | 109.5 |
| H(48A)-C(48)-H(48C) | 109.5 |
| H(48B)-C(48)-H(48C) | 109.5 |

Symmetry transformations used to generate equivalent atoms:

Table 4. Anisotropic displacement parameters ( $\text{Å}^2 \times 10^3$ ) for sa2478.

The anisotropic displacement factor exponent takes the form:

$$-2 \pi^2 [ h^2 a^{*2} U_{11} + \dots + 2 h k a^* b^* U_{12} ]$$

| U11   | U22    | U33    | U23   | U13    | U12    |        |
|-------|--------|--------|-------|--------|--------|--------|
| Si(1) | 44(1)  | 38(1)  | 32(1) | -6(1)  | 3(1)   | -4(1)  |
| Si(2) | 30(1)  | 29(1)  | 26(1) | -2(1)  | -2(1)  | -2(1)  |
| O(1)  | 62(2)  | 38(2)  | 47(2) | 1(1)   | -17(2) | -20(2) |
| O(2)  | 52(2)  | 28(1)  | 31(1) | 3(1)   | -9(1)  | -13(1) |
| O(3)  | 38(1)  | 38(1)  | 26(1) | -6(1)  | -4(1)  | -5(1)  |
| O(4)  | 58(2)  | 36(1)  | 50(2) | 3(1)   | -17(2) | -17(1) |
| O(5)  | 61(2)  | 29(1)  | 33(1) | 5(1)   | -4(1)  | -16(1) |
| O(6)  | 39(1)  | 36(1)  | 30(1) | -9(1)  | -7(1)  | 6(1)   |
| N(1)  | 35(2)  | 33(2)  | 29(1) | 1(1)   | -2(1)  | 4(1)   |
| N(2)  | 41(2)  | 30(2)  | 29(1) | 2(1)   | -2(1)  | 6(1)   |
| C(1)  | 30(2)  | 23(2)  | 30(2) | 1(1)   | -3(1)  | -2(2)  |
| C(2)  | 31(2)  | 35(2)  | 29(2) | -1(1)  | -1(1)  | 3(2)   |
| C(3)  | 32(2)  | 26(2)  | 22(1) | 0(1)   | -3(1)  | -2(1)  |
| C(4)  | 38(2)  | 29(2)  | 25(2) | -1(1)  | -5(1)  | -2(2)  |
| C(5)  | 48(2)  | 32(2)  | 35(2) | 2(1)   | 0(2)   | -8(2)  |
| C(6)  | 43(2)  | 57(3)  | 35(2) | 0(2)   | 2(2)   | -16(2) |
| C(7)  | 26(2)  | 71(3)  | 34(2) | -3(2)  | -1(2)  | -2(2)  |
| C(8)  | 31(2)  | 45(2)  | 26(2) | 1(2)   | -5(1)  | 7(2)   |
| C(9)  | 42(2)  | 33(2)  | 33(2) | 2(2)   | -7(2)  | -8(2)  |
| C(10) | 32(2)  | 27(2)  | 41(2) | -1(2)  | -8(2)  | -1(2)  |
| C(11) | 32(2)  | 25(2)  | 28(2) | 0(1)   | -3(1)  | 3(2)   |
| C(12) | 27(2)  | 22(2)  | 28(2) | -1(1)  | -1(1)  | 4(1)   |
| C(13) | 25(2)  | 25(2)  | 26(1) | -4(1)  | 2(1)   | -3(1)  |
| C(14) | 31(2)  | 28(2)  | 31(2) | 1(1)   | -3(1)  | 2(2)   |
| C(15) | 35(2)  | 30(2)  | 31(2) | 2(1)   | -7(1)  | -1(2)  |
| C(16) | 33(2)  | 31(2)  | 27(2) | -4(1)  | 1(1)   | -3(2)  |
| C(17) | 38(2)  | 26(2)  | 30(2) | 0(1)   | 0(1)   | -8(2)  |
| C(18) | 31(2)  | 26(2)  | 29(2) | 2(1)   | 1(1)   | -1(2)  |
| C(19) | 121(5) | 42(2)  | 48(3) | 7(2)   | 22(3)  | -6(3)  |
| C(20) | 41(3)  | 115(5) | 80(4) | -36(4) | 8(2)   | -5(3)  |
| C(21) | 57(3)  | 35(2)  | 34(2) | -6(2)  | -10(2) | 5(2)   |

|       |        |       |       |        |        |        |
|-------|--------|-------|-------|--------|--------|--------|
| C(22) | 71(3)  | 55(3) | 89(4) | -17(3) | -34(3) | -3(3)  |
| C(23) | 87(4)  | 38(2) | 73(3) | 3(2)   | -22(3) | -6(3)  |
| C(24) | 117(5) | 78(4) | 48(3) | -29(3) | 7(3)   | 4(4)   |
| C(25) | 26(2)  | 24(2) | 27(2) | 1(1)   | -3(1)  | -1(1)  |
| C(26) | 30(2)  | 33(2) | 28(2) | 3(1)   | -1(1)  | 3(2)   |
| C(27) | 30(2)  | 32(2) | 20(1) | -1(1)  | -2(1)  | 0(2)   |
| C(28) | 33(2)  | 31(2) | 27(2) | -1(1)  | -1(1)  | -3(2)  |
| C(29) | 60(3)  | 40(2) | 31(2) | 6(2)   | -1(2)  | -15(2) |
| C(30) | 47(2)  | 72(3) | 36(2) | 4(2)   | 0(2)   | -27(2) |
| C(31) | 31(2)  | 79(3) | 29(2) | -3(2)  | -3(2)  | -1(2)  |
| C(32) | 32(2)  | 47(2) | 26(2) | -6(2)  | -4(1)  | 4(2)   |
| C(33) | 37(2)  | 32(2) | 33(2) | -2(2)  | -9(2)  | -1(2)  |
| C(34) | 37(2)  | 25(2) | 36(2) | -3(1)  | -5(2)  | 0(2)   |
| C(35) | 34(2)  | 22(2) | 32(2) | -3(1)  | -1(2)  | -1(2)  |
| C(36) | 26(2)  | 23(2) | 28(2) | 0(1)   | 2(1)   | 4(1)   |
| C(37) | 24(2)  | 24(2) | 26(2) | 0(1)   | 2(1)   | 0(1)   |
| C(38) | 40(2)  | 25(2) | 34(2) | 1(1)   | -5(2)  | -2(2)  |
| C(39) | 44(2)  | 32(2) | 28(2) | 7(1)   | -6(2)  | 3(2)   |
| C(40) | 27(2)  | 34(2) | 24(2) | -8(1)  | 2(1)   | -1(2)  |
| C(41) | 36(2)  | 24(2) | 26(2) | -2(1)  | 2(1)   | -4(2)  |
| C(42) | 31(2)  | 25(2) | 26(2) | 0(1)   | -1(1)  | -1(2)  |
| C(43) | 42(2)  | 43(2) | 38(2) | -3(2)  | -3(2)  | 7(2)   |
| C(44) | 44(2)  | 42(2) | 57(3) | 4(2)   | -2(2)  | -11(2) |
| C(45) | 48(2)  | 39(2) | 29(2) | -4(2)  | -1(2)  | 3(2)   |
| C(46) | 115(5) | 96(4) | 43(3) | 19(3)  | 11(3)  | -48(4) |
| C(47) | 81(4)  | 76(3) | 31(2) | -12(2) | -5(2)  | 28(3)  |
| C(48) | 82(3)  | 73(3) | 38(2) | 0(2)   | -8(2)  | 31(3)  |

Table 5. Hydrogen coordinates ( $\times 10^4$ ) and isotropic displacement parameters ( $\text{Å}^2 \times 10^3$ ) for sa2478.

|       | x     | y    | z    | U(eq) |
|-------|-------|------|------|-------|
| H(2)  | 162   | 2084 | 2973 | 55    |
| H(5)  | 10028 | 7979 | 6974 | 61    |
| H(2A) | -561  | 5166 | 2317 | 38    |
| H(5A) | 2328  | 6935 | 1512 | 46    |
| H(6)  | 4206  | 6381 | 1290 | 54    |
| H(7)  | 4707  | 4882 | 1435 | 52    |
| H(8)  | 3389  | 3875 | 1827 | 41    |
| H(9A) | -274  | 3860 | 1649 | 43    |
| H(9B) | 989   | 3361 | 1587 | 43    |
| H(14) | 2220  | 3175 | 3428 | 36    |



|        |       |      |      |     |
|--------|-------|------|------|-----|
| H(15)  | 3060  | 3868 | 4119 | 38  |
| H(17)  | 2549  | 6358 | 3510 | 37  |
| H(18)  | 1730  | 5671 | 2815 | 34  |
| H(19A) | 3584  | 4519 | 5271 | 106 |
| H(19B) | 2405  | 4102 | 5034 | 106 |
| H(19C) | 2325  | 4703 | 5524 | 106 |
| H(20A) | 667   | 5313 | 4499 | 118 |
| H(20B) | 866   | 6393 | 4481 | 118 |
| H(20C) | 506   | 5911 | 4986 | 118 |
| H(22A) | 4978  | 6425 | 4972 | 107 |
| H(22B) | 4577  | 5966 | 5479 | 107 |
| H(22C) | 4838  | 7038 | 5455 | 107 |
| H(23A) | 2317  | 7618 | 4707 | 99  |
| H(23B) | 3628  | 7416 | 4511 | 99  |
| H(23C) | 3435  | 8063 | 4978 | 99  |
| H(24A) | 2564  | 6375 | 5839 | 122 |
| H(24B) | 1684  | 7013 | 5531 | 122 |
| H(24C) | 2848  | 7439 | 5777 | 122 |
| H(26)  | 10623 | 4926 | 7706 | 36  |
| H(29)  | 7575  | 3245 | 8459 | 52  |
| H(30)  | 5692  | 3844 | 8637 | 62  |
| H(31)  | 5280  | 5374 | 8487 | 55  |
| H(32)  | 6682  | 6322 | 8112 | 42  |
| H(33A) | 9041  | 6824 | 8364 | 41  |
| H(33B) | 10288 | 6290 | 8349 | 41  |
| H(38)  | 8047  | 6855 | 6484 | 39  |
| H(39)  | 7107  | 6125 | 5840 | 41  |
| H(41)  | 7261  | 3731 | 6574 | 34  |
| H(42)  | 8219  | 4459 | 7223 | 33  |
| H(43A) | 8407  | 2917 | 5968 | 61  |
| H(43B) | 9002  | 3643 | 5605 | 61  |
| H(43C) | 8704  | 2637 | 5413 | 61  |
| H(44A) | 5002  | 2912 | 5460 | 71  |
| H(44B) | 5781  | 2492 | 5896 | 71  |
| H(44C) | 5936  | 2117 | 5348 | 71  |
| H(46A) | 8695  | 4370 | 4796 | 127 |
| H(46B) | 7737  | 5134 | 4933 | 127 |
| H(46C) | 7924  | 4841 | 4372 | 127 |
| H(47A) | 6682  | 2613 | 4466 | 94  |
| H(47B) | 8061  | 2830 | 4540 | 94  |
| H(47C) | 7347  | 3292 | 4097 | 94  |
| H(48A) | 5562  | 4770 | 4823 | 97  |
| H(48B) | 5191  | 3778 | 4632 | 97  |
| H(48C) | 5843  | 4475 | 4269 | 97  |

Table 6. Torsion angles [deg] for sa2478.

|                         |           |
|-------------------------|-----------|
| C(20)-Si(1)-O(3)-C(16)  | -35.0(4)  |
| C(19)-Si(1)-O(3)-C(16)  | 84.9(4)   |
| C(21)-Si(1)-O(3)-C(16)  | -155.0(3) |
| C(44)-Si(2)-O(6)-C(40)  | 114.4(3)  |
| C(43)-Si(2)-O(6)-C(40)  | -8.0(3)   |
| C(45)-Si(2)-O(6)-C(40)  | -126.6(3) |
| C(4)-N(1)-C(2)-C(1)     | -2.2(4)   |
| C(3)-C(1)-C(2)-N(1)     | 2.6(4)    |
| C(12)-C(1)-C(2)-N(1)    | 128.3(3)  |
| C(9)-C(1)-C(2)-N(1)     | -116.5(3) |
| C(2)-C(1)-C(3)-C(8)     | 179.2(3)  |
| C(12)-C(1)-C(3)-C(8)    | 56.7(5)   |
| C(9)-C(1)-C(3)-C(8)     | -65.5(5)  |
| C(2)-C(1)-C(3)-C(4)     | -1.9(3)   |
| C(12)-C(1)-C(3)-C(4)    | -124.4(3) |
| C(9)-C(1)-C(3)-C(4)     | 113.4(3)  |
| C(8)-C(3)-C(4)-C(5)     | -0.3(5)   |
| C(1)-C(3)-C(4)-C(5)     | -179.3(3) |
| C(8)-C(3)-C(4)-N(1)     | 180.0(3)  |
| C(1)-C(3)-C(4)-N(1)     | 0.9(4)    |
| C(2)-N(1)-C(4)-C(5)     | -179.0(3) |
| C(2)-N(1)-C(4)-C(3)     | 0.7(4)    |
| C(3)-C(4)-C(5)-C(6)     | -0.1(5)   |
| N(1)-C(4)-C(5)-C(6)     | 179.6(3)  |
| C(4)-C(5)-C(6)-C(7)     | 0.7(6)    |
| C(5)-C(6)-C(7)-C(8)     | -0.9(6)   |
| C(4)-C(3)-C(8)-C(7)     | 0.2(5)    |
| C(1)-C(3)-C(8)-C(7)     | 178.9(3)  |
| C(6)-C(7)-C(8)-C(3)     | 0.4(5)    |
| C(3)-C(1)-C(9)-C(10)    | 143.6(3)  |
| C(2)-C(1)-C(9)-C(10)    | -107.4(3) |
| C(12)-C(1)-C(9)-C(10)   | 13.9(4)   |
| C(1)-C(9)-C(10)-O(1)    | 166.1(4)  |
| C(1)-C(9)-C(10)-C(11)   | -13.4(4)  |
| O(1)-C(10)-C(11)-O(2)   | 3.8(6)    |
| C(9)-C(10)-C(11)-O(2)   | -176.6(3) |
| O(1)-C(10)-C(11)-C(12)  | -171.8(4) |
| C(9)-C(10)-C(11)-C(12)  | 7.8(4)    |
| O(2)-C(11)-C(12)-C(13)  | 1.7(6)    |
| C(10)-C(11)-C(12)-C(13) | 177.0(3)  |
| O(2)-C(11)-C(12)-C(1)   | -173.7(3) |

|                         |           |
|-------------------------|-----------|
| C(10)-C(11)-C(12)-C(1)  | 1.7(4)    |
| C(3)-C(1)-C(12)-C(11)   | -137.2(3) |
| C(2)-C(1)-C(12)-C(11)   | 108.2(3)  |
| C(9)-C(1)-C(12)-C(11)   | -9.9(4)   |
| C(3)-C(1)-C(12)-C(13)   | 47.4(4)   |
| C(2)-C(1)-C(12)-C(13)   | -67.3(4)  |
| C(9)-C(1)-C(12)-C(13)   | 174.6(3)  |
| C(11)-C(12)-C(13)-C(18) | -152.8(3) |
| C(1)-C(12)-C(13)-C(18)  | 22.0(5)   |
| C(11)-C(12)-C(13)-C(14) | 22.3(5)   |
| C(1)-C(12)-C(13)-C(14)  | -162.9(3) |
| C(18)-C(13)-C(14)-C(15) | 2.1(5)    |
| C(12)-C(13)-C(14)-C(15) | -173.2(3) |
| C(13)-C(14)-C(15)-C(16) | 0.8(5)    |
| Si(1)-O(3)-C(16)-C(17)  | 105.8(3)  |
| Si(1)-O(3)-C(16)-C(15)  | -75.2(4)  |
| C(14)-C(15)-C(16)-O(3)  | 177.7(3)  |
| C(14)-C(15)-C(16)-C(17) | -3.3(6)   |
| O(3)-C(16)-C(17)-C(18)  | -178.0(3) |
| C(15)-C(16)-C(17)-C(18) | 2.9(5)    |
| C(16)-C(17)-C(18)-C(13) | 0.0(5)    |
| C(14)-C(13)-C(18)-C(17) | -2.5(5)   |
| C(12)-C(13)-C(18)-C(17) | 172.8(3)  |
| O(3)-Si(1)-C(21)-C(22)  | -65.2(4)  |
| C(20)-Si(1)-C(21)-C(22) | 178.2(4)  |
| C(19)-Si(1)-C(21)-C(22) | 54.8(4)   |
| O(3)-Si(1)-C(21)-C(23)  | 55.4(4)   |
| C(20)-Si(1)-C(21)-C(23) | -61.2(4)  |
| C(19)-Si(1)-C(21)-C(23) | 175.4(4)  |
| O(3)-Si(1)-C(21)-C(24)  | 174.0(3)  |
| C(20)-Si(1)-C(21)-C(24) | 57.4(4)   |
| C(19)-Si(1)-C(21)-C(24) | -66.0(4)  |
| C(28)-N(2)-C(26)-C(25)  | 2.0(4)    |
| C(27)-C(25)-C(26)-N(2)  | -2.1(4)   |
| C(36)-C(25)-C(26)-N(2)  | -127.0(3) |
| C(33)-C(25)-C(26)-N(2)  | 117.4(3)  |
| C(26)-C(25)-C(27)-C(32) | -179.2(3) |
| C(36)-C(25)-C(27)-C(32) | -57.1(5)  |
| C(33)-C(25)-C(27)-C(32) | 64.5(5)   |
| C(26)-C(25)-C(27)-C(28) | 1.3(3)    |
| C(36)-C(25)-C(27)-C(28) | 123.5(3)  |
| C(33)-C(25)-C(27)-C(28) | -115.0(3) |
| C(32)-C(27)-C(28)-C(29) | 1.8(5)    |
| C(25)-C(27)-C(28)-C(29) | -178.6(3) |

|                         |           |
|-------------------------|-----------|
| C(32)-C(27)-C(28)-N(2)  | -179.9(3) |
| C(25)-C(27)-C(28)-N(2)  | -0.4(4)   |
| C(26)-N(2)-C(28)-C(29)  | 177.2(4)  |
| C(26)-N(2)-C(28)-C(27)  | -1.0(4)   |
| C(27)-C(28)-C(29)-C(30) | -1.1(5)   |
| N(2)-C(28)-C(29)-C(30)  | -179.1(3) |
| C(28)-C(29)-C(30)-C(31) | -0.8(6)   |
| C(29)-C(30)-C(31)-C(32) | 2.1(6)    |
| C(28)-C(27)-C(32)-C(31) | -0.6(5)   |
| C(25)-C(27)-C(32)-C(31) | -180.0(3) |
| C(30)-C(31)-C(32)-C(27) | -1.3(5)   |
| C(27)-C(25)-C(33)-C(34) | -144.8(3) |
| C(26)-C(25)-C(33)-C(34) | 105.5(3)  |
| C(36)-C(25)-C(33)-C(34) | -16.0(4)  |
| C(25)-C(33)-C(34)-O(4)  | -164.7(4) |
| C(25)-C(33)-C(34)-C(35) | 15.7(4)   |
| O(4)-C(34)-C(35)-O(5)   | -5.0(6)   |
| C(33)-C(34)-C(35)-O(5)  | 174.5(3)  |
| O(4)-C(34)-C(35)-C(36)  | 171.2(4)  |
| C(33)-C(34)-C(35)-C(36) | -9.3(4)   |
| O(5)-C(35)-C(36)-C(37)  | -1.8(6)   |
| C(34)-C(35)-C(36)-C(37) | -177.9(3) |
| O(5)-C(35)-C(36)-C(25)  | 174.4(3)  |
| C(34)-C(35)-C(36)-C(25) | -1.6(4)   |
| C(27)-C(25)-C(36)-C(35) | 138.0(3)  |
| C(26)-C(25)-C(36)-C(35) | -107.8(3) |
| C(33)-C(25)-C(36)-C(35) | 11.3(4)   |
| C(27)-C(25)-C(36)-C(37) | -45.5(4)  |
| C(26)-C(25)-C(36)-C(37) | 68.7(4)   |
| C(33)-C(25)-C(36)-C(37) | -172.2(3) |
| C(35)-C(36)-C(37)-C(42) | 158.6(3)  |
| C(25)-C(36)-C(37)-C(42) | -17.2(5)  |
| C(35)-C(36)-C(37)-C(38) | -19.2(5)  |
| C(25)-C(36)-C(37)-C(38) | 164.9(3)  |
| C(42)-C(37)-C(38)-C(39) | -1.2(5)   |
| C(36)-C(37)-C(38)-C(39) | 176.8(3)  |
| C(37)-C(38)-C(39)-C(40) | -0.1(6)   |
| Si(2)-O(6)-C(40)-C(41)  | -52.2(4)  |
| Si(2)-O(6)-C(40)-C(39)  | 129.7(3)  |
| C(38)-C(39)-C(40)-O(6)  | 179.8(3)  |
| C(38)-C(39)-C(40)-C(41) | 1.7(6)    |
| O(6)-C(40)-C(41)-C(42)  | -180.0(3) |
| C(39)-C(40)-C(41)-C(42) | -1.9(5)   |
| C(40)-C(41)-C(42)-C(37) | 0.5(5)    |

|                         |           |
|-------------------------|-----------|
| C(38)-C(37)-C(42)-C(41) | 0.9(5)    |
| C(36)-C(37)-C(42)-C(41) | -177.0(3) |
| O(6)-Si(2)-C(45)-C(48)  | -58.2(3)  |
| C(44)-Si(2)-C(45)-C(48) | 57.3(4)   |
| C(43)-Si(2)-C(45)-C(48) | -176.9(3) |
| O(6)-Si(2)-C(45)-C(46)  | 62.3(4)   |
| C(44)-Si(2)-C(45)-C(46) | 177.8(4)  |
| C(43)-Si(2)-C(45)-C(46) | -56.4(4)  |
| O(6)-Si(2)-C(45)-C(47)  | -178.5(3) |
| C(44)-Si(2)-C(45)-C(47) | -63.0(4)  |
| C(43)-Si(2)-C(45)-C(47) | 62.8(4)   |

---

Symmetry transformations used to generate equivalent atoms:

Table 7. Hydrogen bonds for sa2478 [Å and deg.].

---

| D-H...A | d(D-H) | d(H...A) | d(D...A) | <(DHA) |
|---------|--------|----------|----------|--------|
|---------|--------|----------|----------|--------|
